# Supplementary material for: Ionenes as Potential Phase Change Materials with Self-Healing Behavior
Source: MDPI journal article supplement (doi:10.3390/polym15224460), 2023-11-19
Supplement: s1 [file s1]

## Supplementary Materials

# Ionenes as Potential Phase Change Materials with Self-Healing Behavior

**Carolina Arriaza-Echanes** <sup>1</sup>, **María V. Velázquez-Tundidor** <sup>2</sup>, **Alejandro Angel-López** <sup>1</sup>, **Ángel Norambuena** <sup>1,3</sup>, **Francisco E. Palay** <sup>1</sup>, **Claudio A. Terraza** <sup>2,4</sup>, **Alain Tundidor-Camba** <sup>2,4</sup>, **Pablo A. Ortiz** <sup>1,5,6,\*</sup> and **Deysma Coll** <sup>1,6,7,\*</sup>

<sup>1</sup> Vicerrectoría de Investigación, Universidad Mayor, Camino la Pirámide 5750, Santiago 8580745, Chile; angel.norambuena@mayor.cl (Á.N.); francisco.palay@mayor.cl (F.E.P.)

<sup>2</sup> Research Laboratory for Organic Polymers (RLOP), Department of Organic Chemistry, Pontificia Universidad Católica de Chile, Santiago 7820436, Chile

<sup>3</sup> Instituto de Investigaciones y Control del Ejército de Chile (IDIC), Santiago 8370899, Chile

<sup>4</sup> UC Energy Research Center, Pontificia Universidad Católica de Chile, Santiago 7820436, Chile

<sup>5</sup> Escuela de Ingeniería en Medio Ambiente y Sustentabilidad, Facultad de Ciencias, Ingeniería y Tecnología, Universidad Mayor, Camino La Pirámide 5750, Santiago 8580745, Chile

<sup>6</sup> Centro de Nanotecnología Aplicada, Facultad de Ciencias, Ingeniería y Tecnología, Universidad Mayor, Camino La Pirámide 5750, Santiago 8580745, Chile

<sup>7</sup> Núcleo de Química y Bioquímica, Facultad de Ciencias, Ingeniería y Tecnología, Universidad Mayor, Camino La Pirámide 5750, Santiago 8580745, Chile

\* Correspondence: pablo.ortiz@umayor.cl (P.A.O.); deysma.coll@umayor.cl (D.C.)

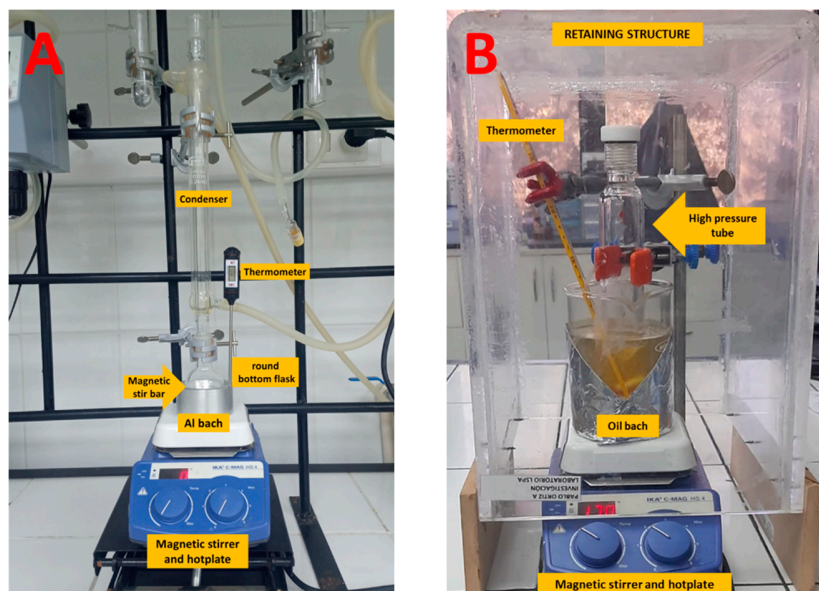

**Figure S1. A.** Experimental setup for the monomers synthesis. **B.** Experimental setup for the ionenes synthesis.

### Spectroscopic data

Below are the infrared and nuclear magnetic resonance spectra of both the synthesized monomers and ionenes.

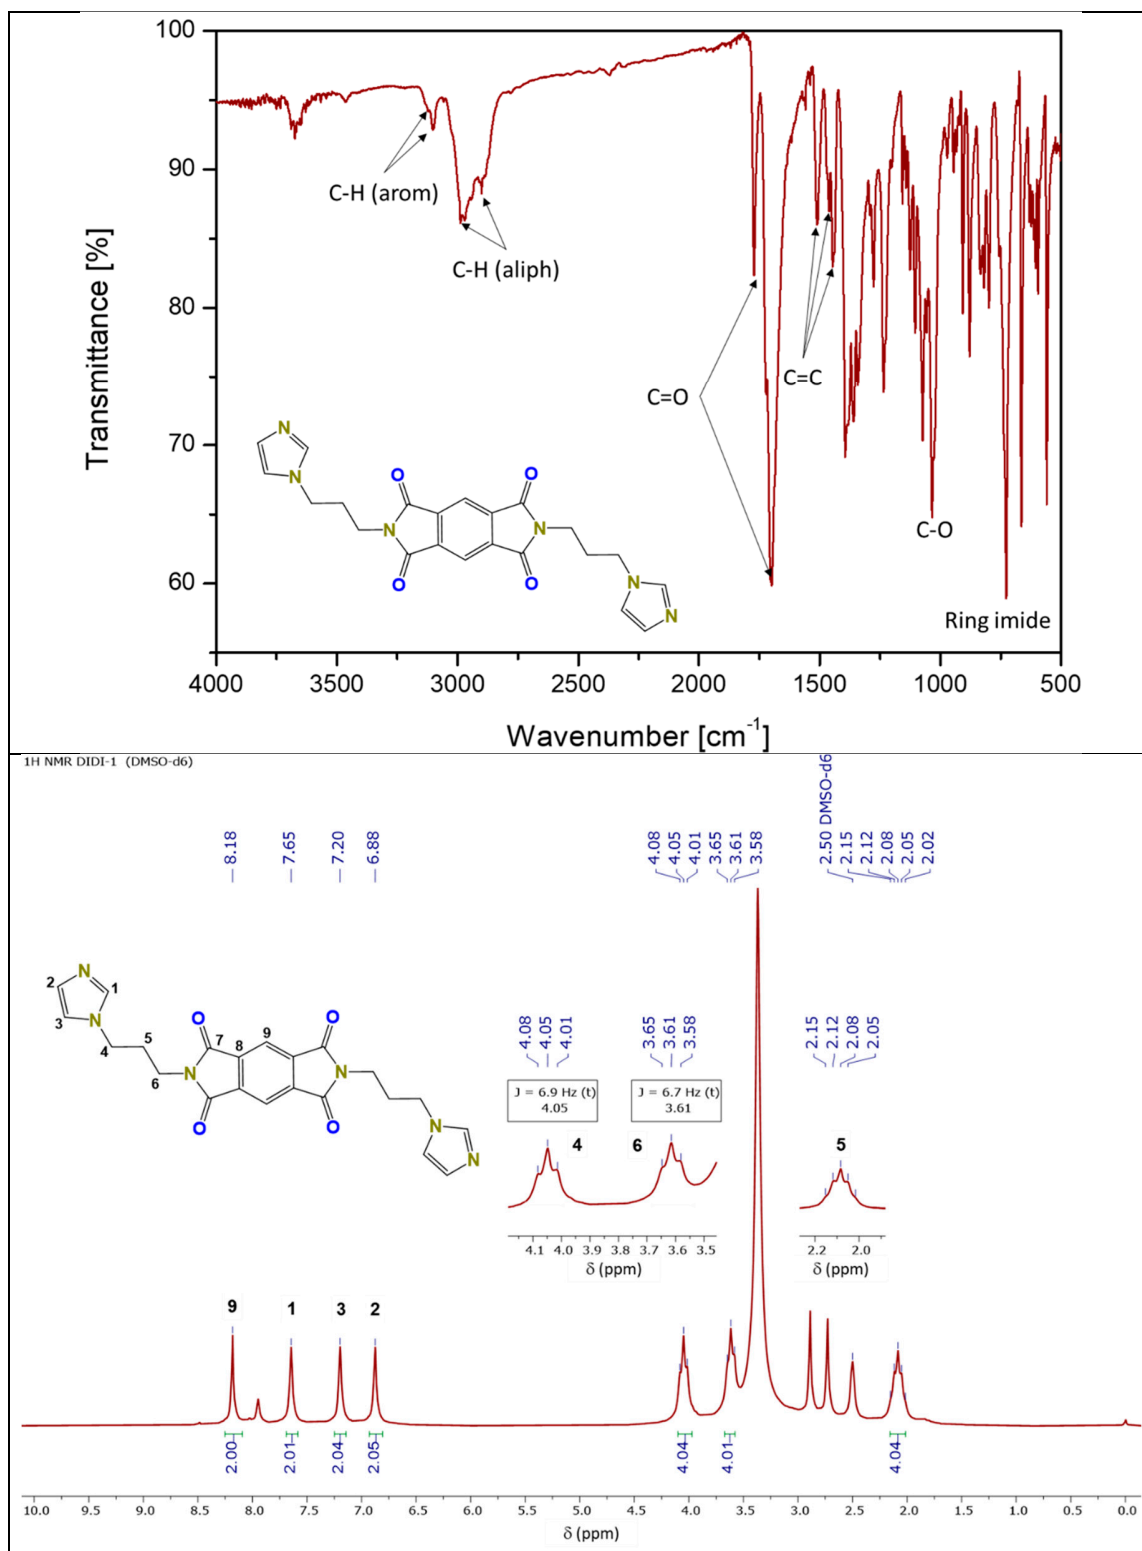

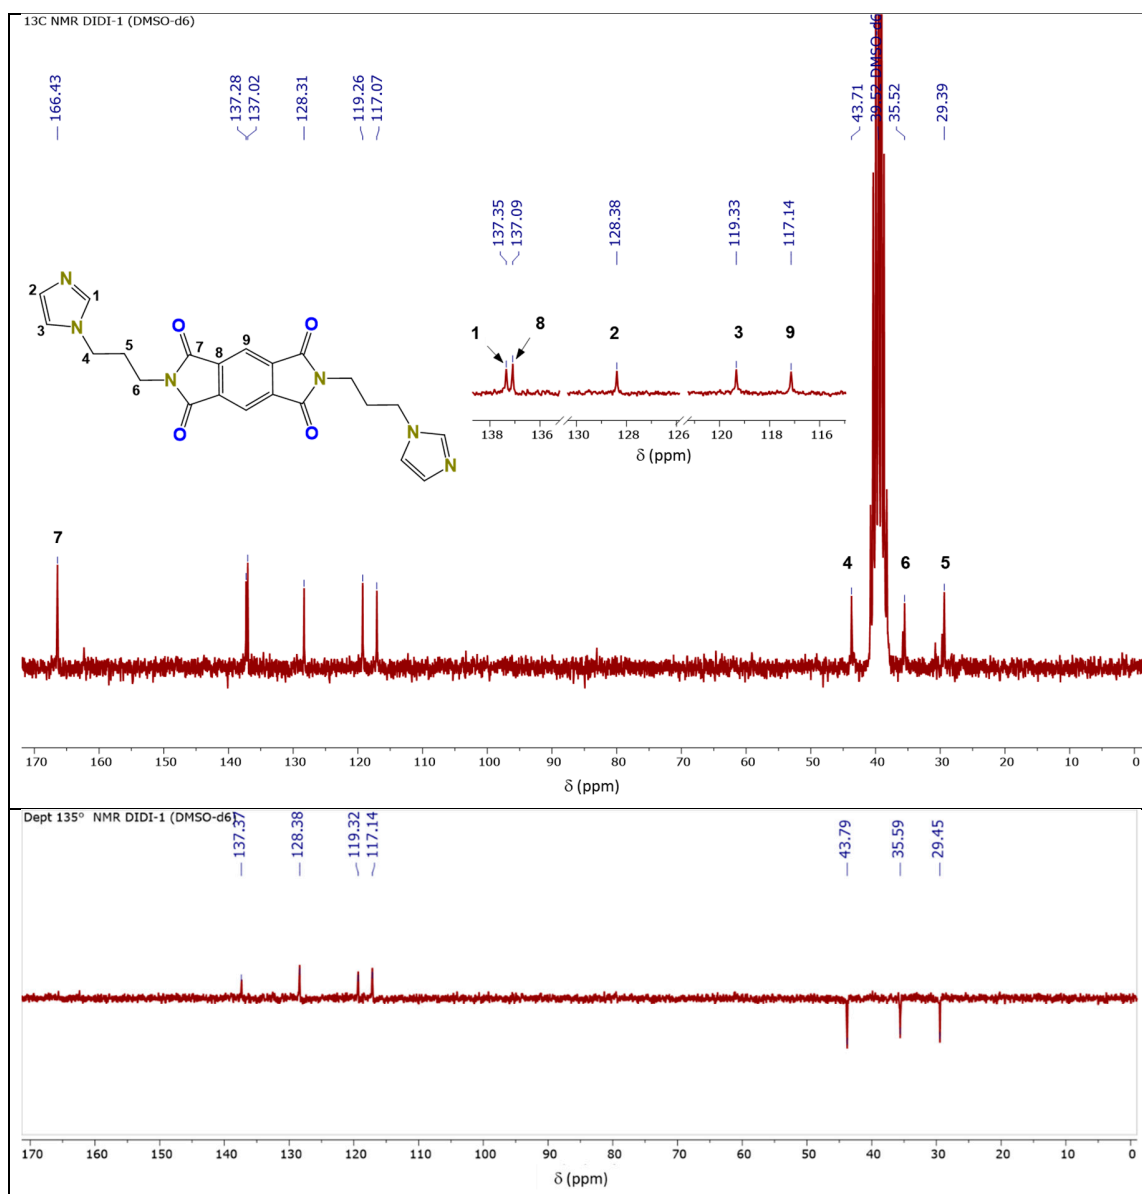

**Figure S2.** IR and <sup>1</sup>H, <sup>13</sup>C and Dept 135°NMR spectra of PMDA-API.



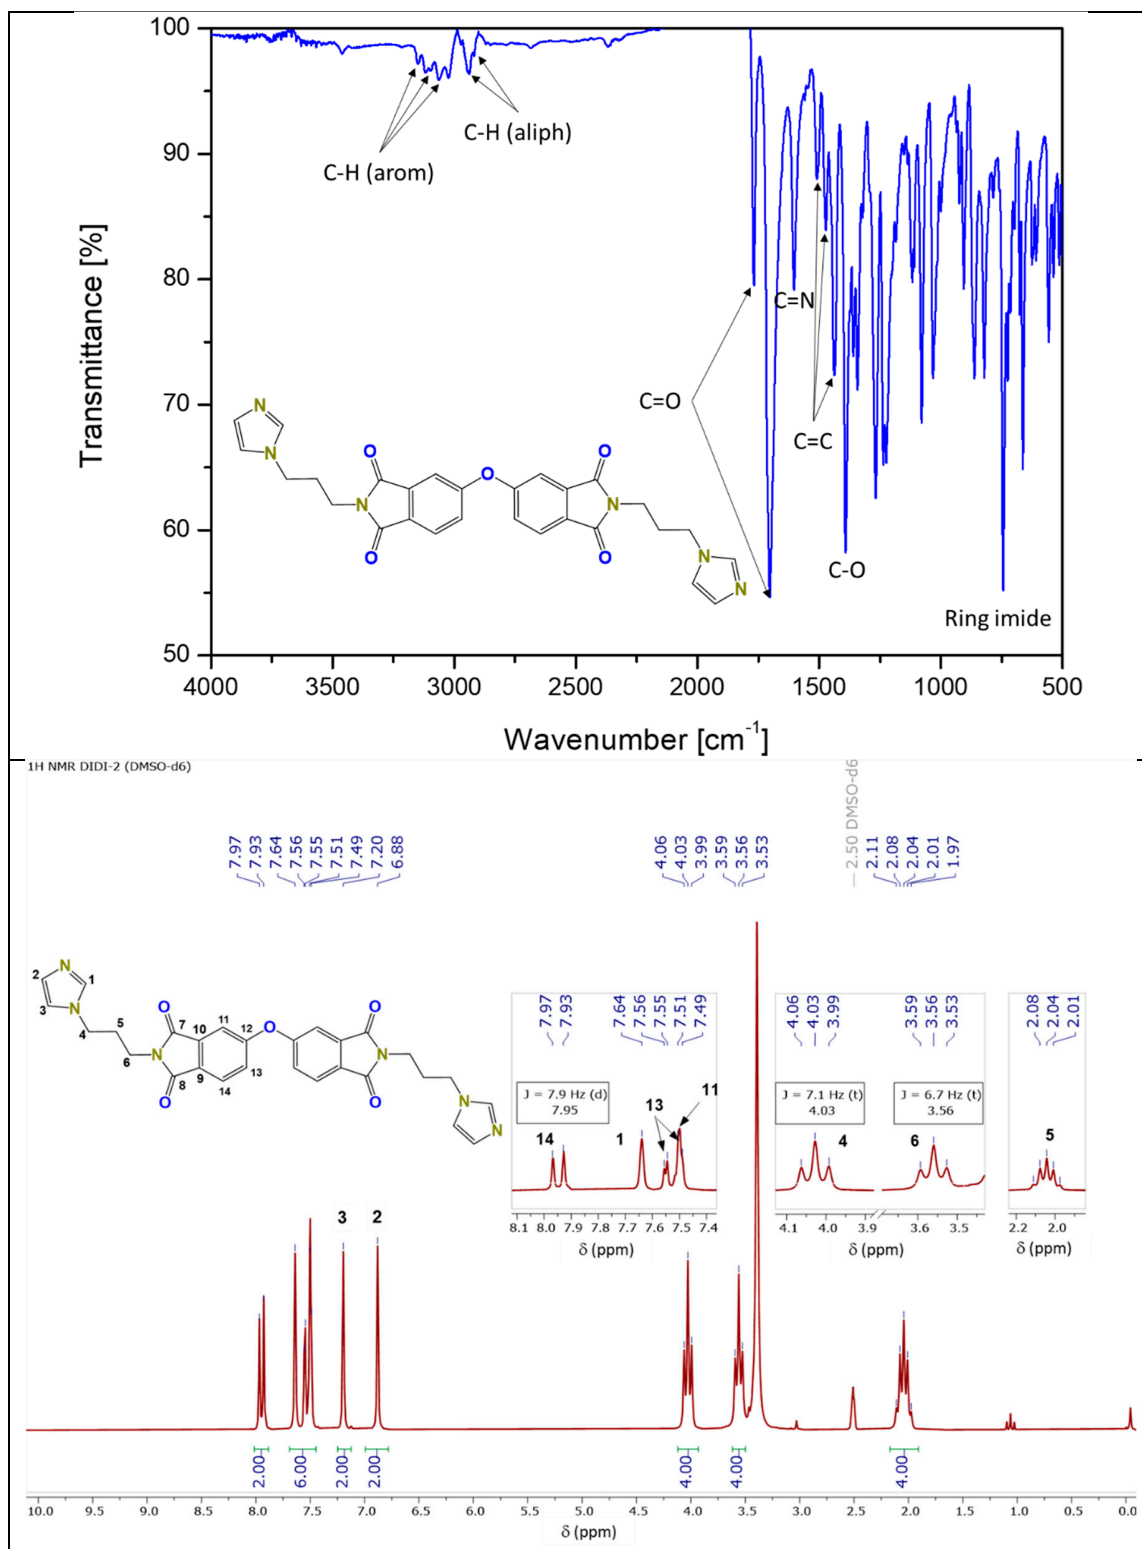

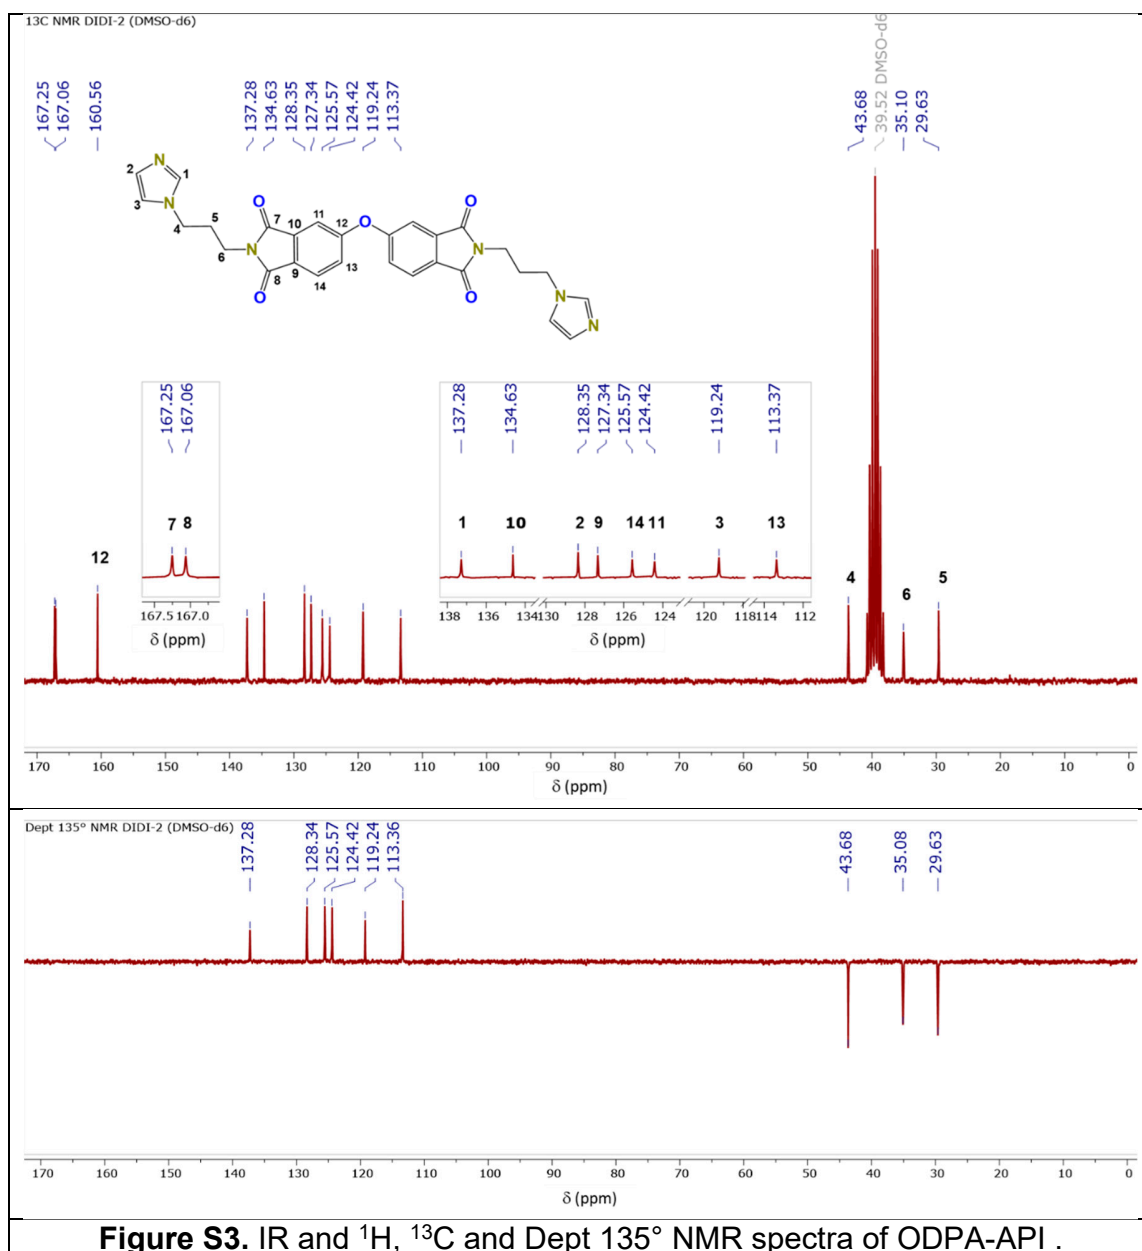

**Figure S3.** IR and <sup>1</sup>H, <sup>13</sup>C and Dept 135° NMR spectra of ODPA-API .

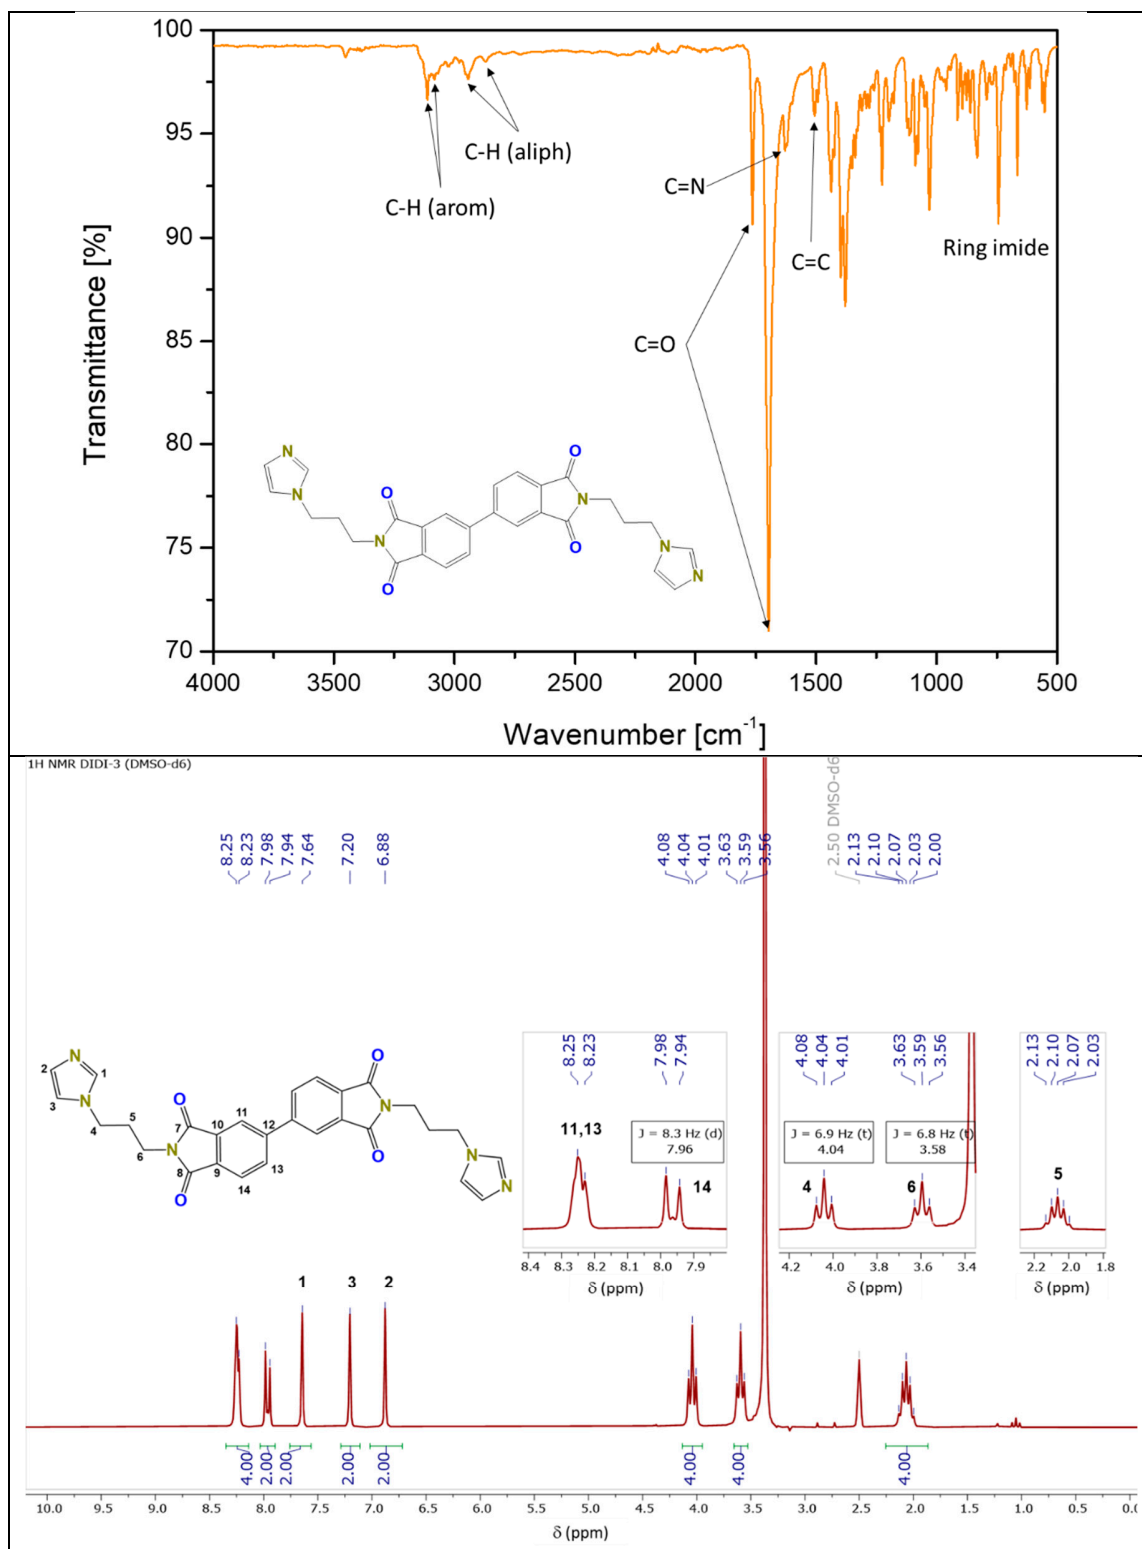

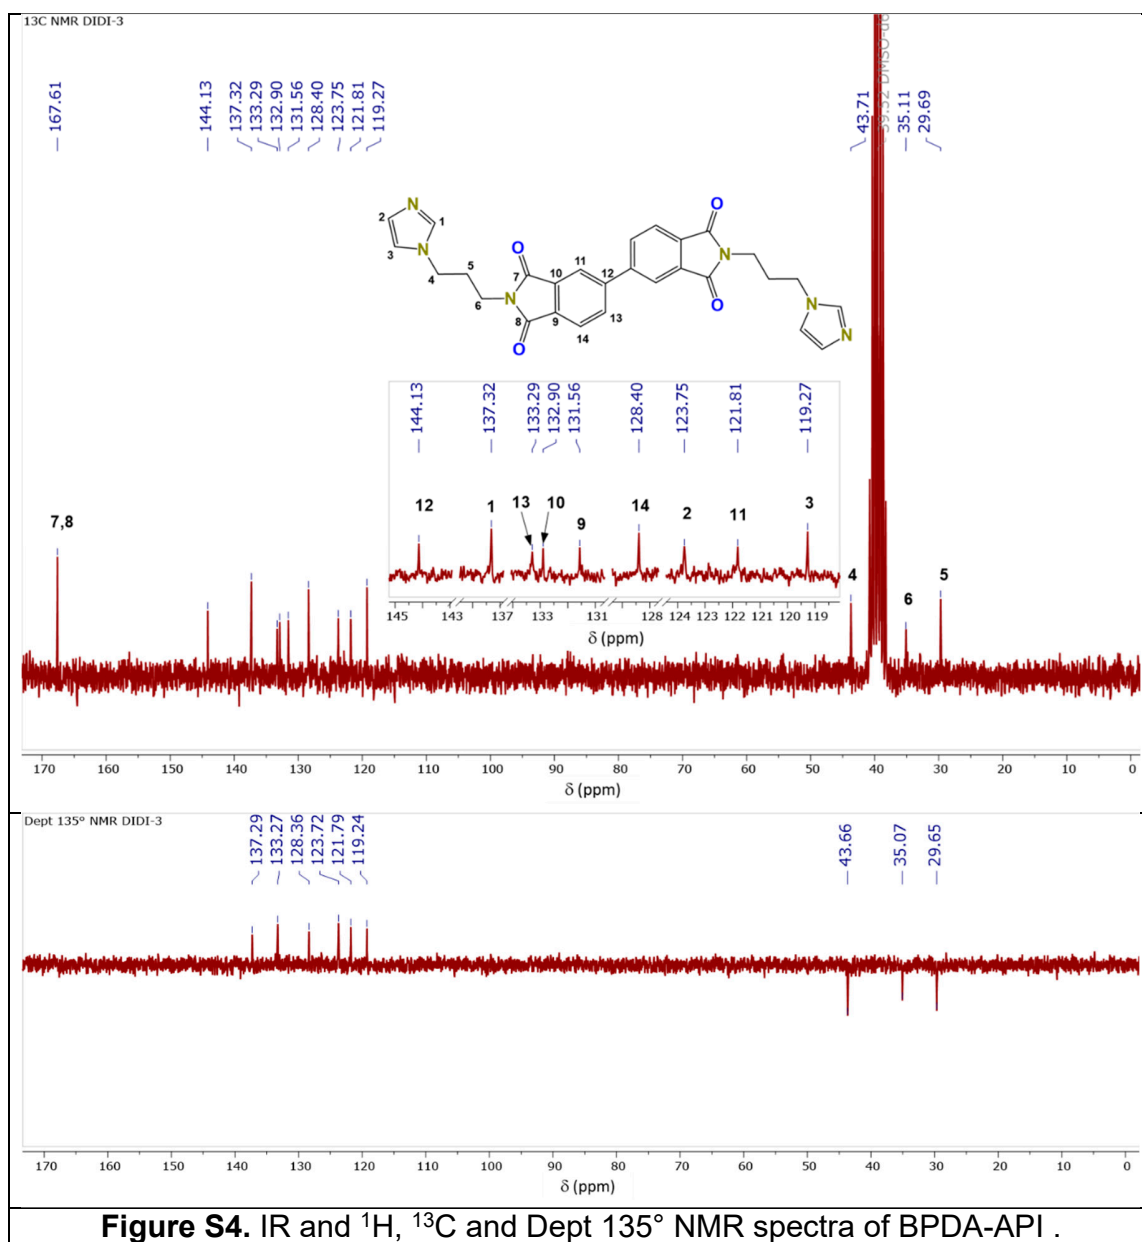

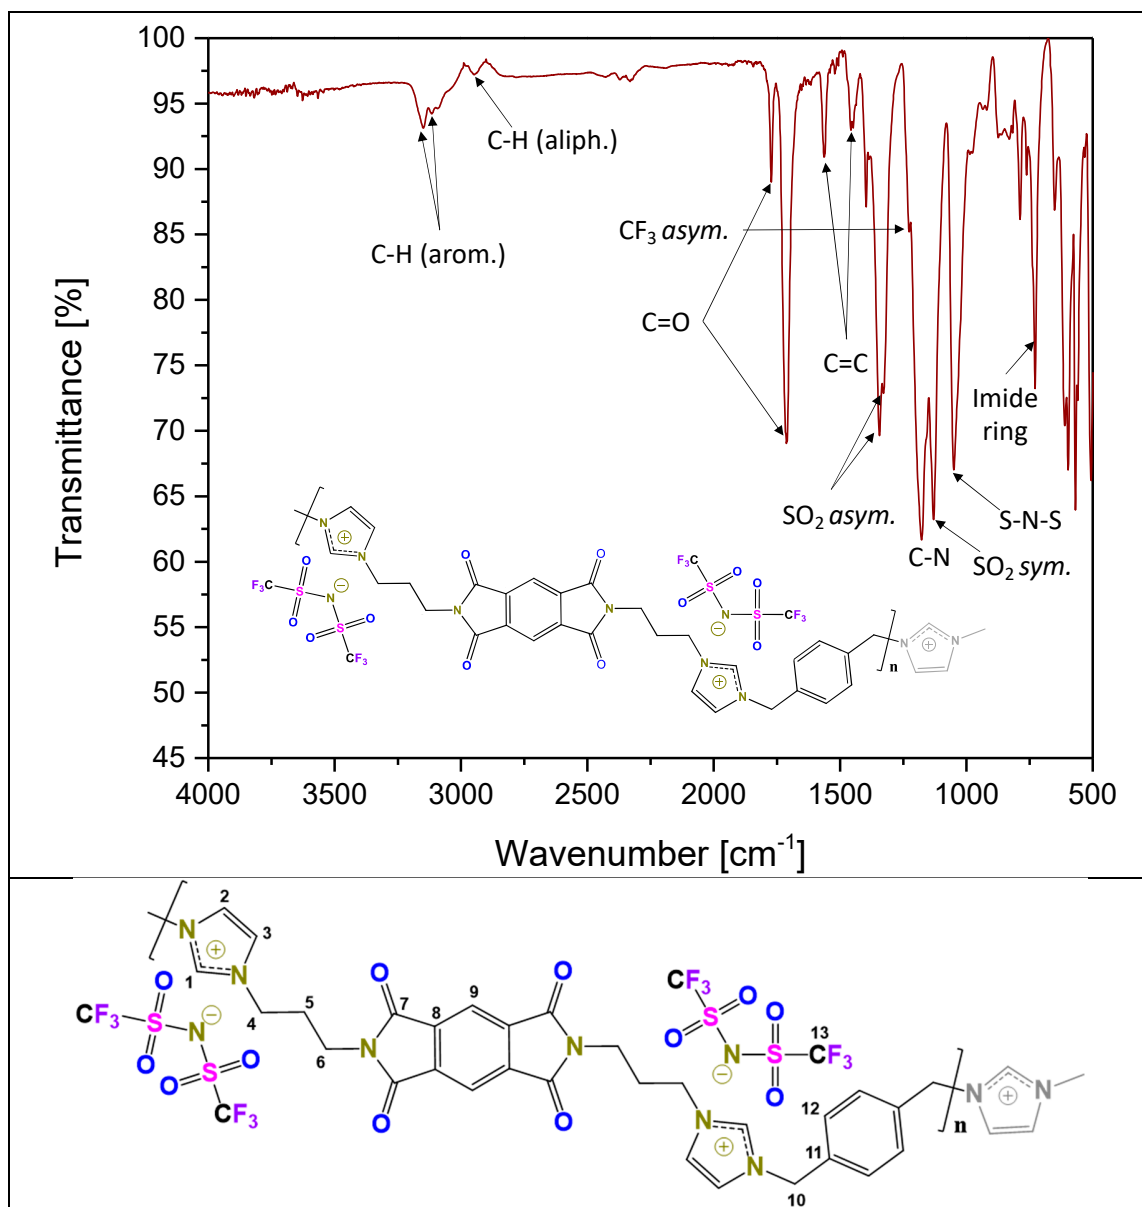

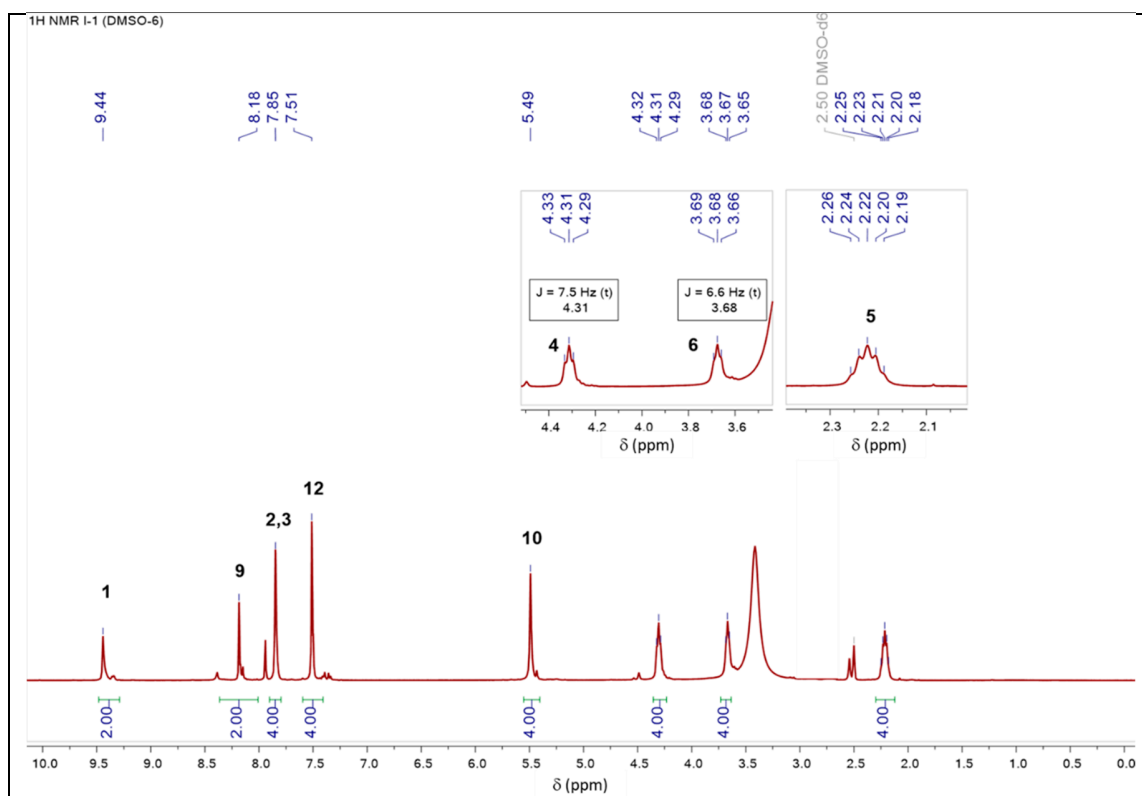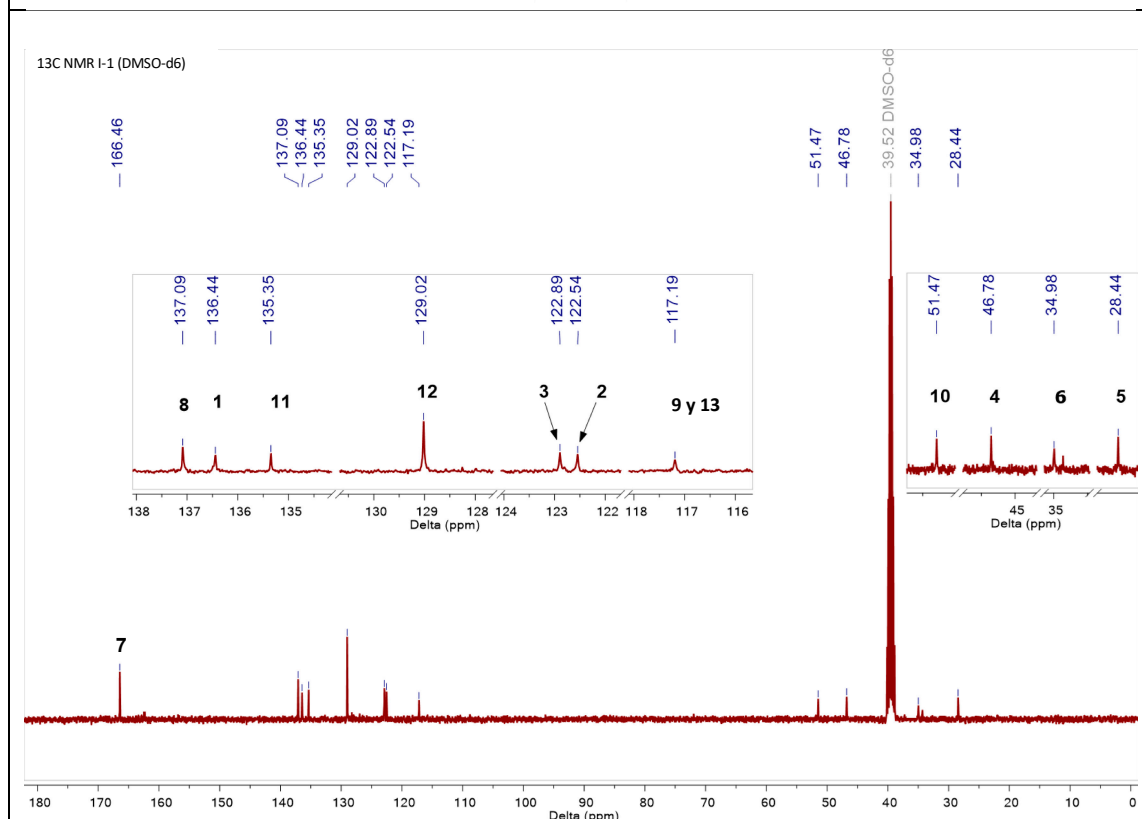

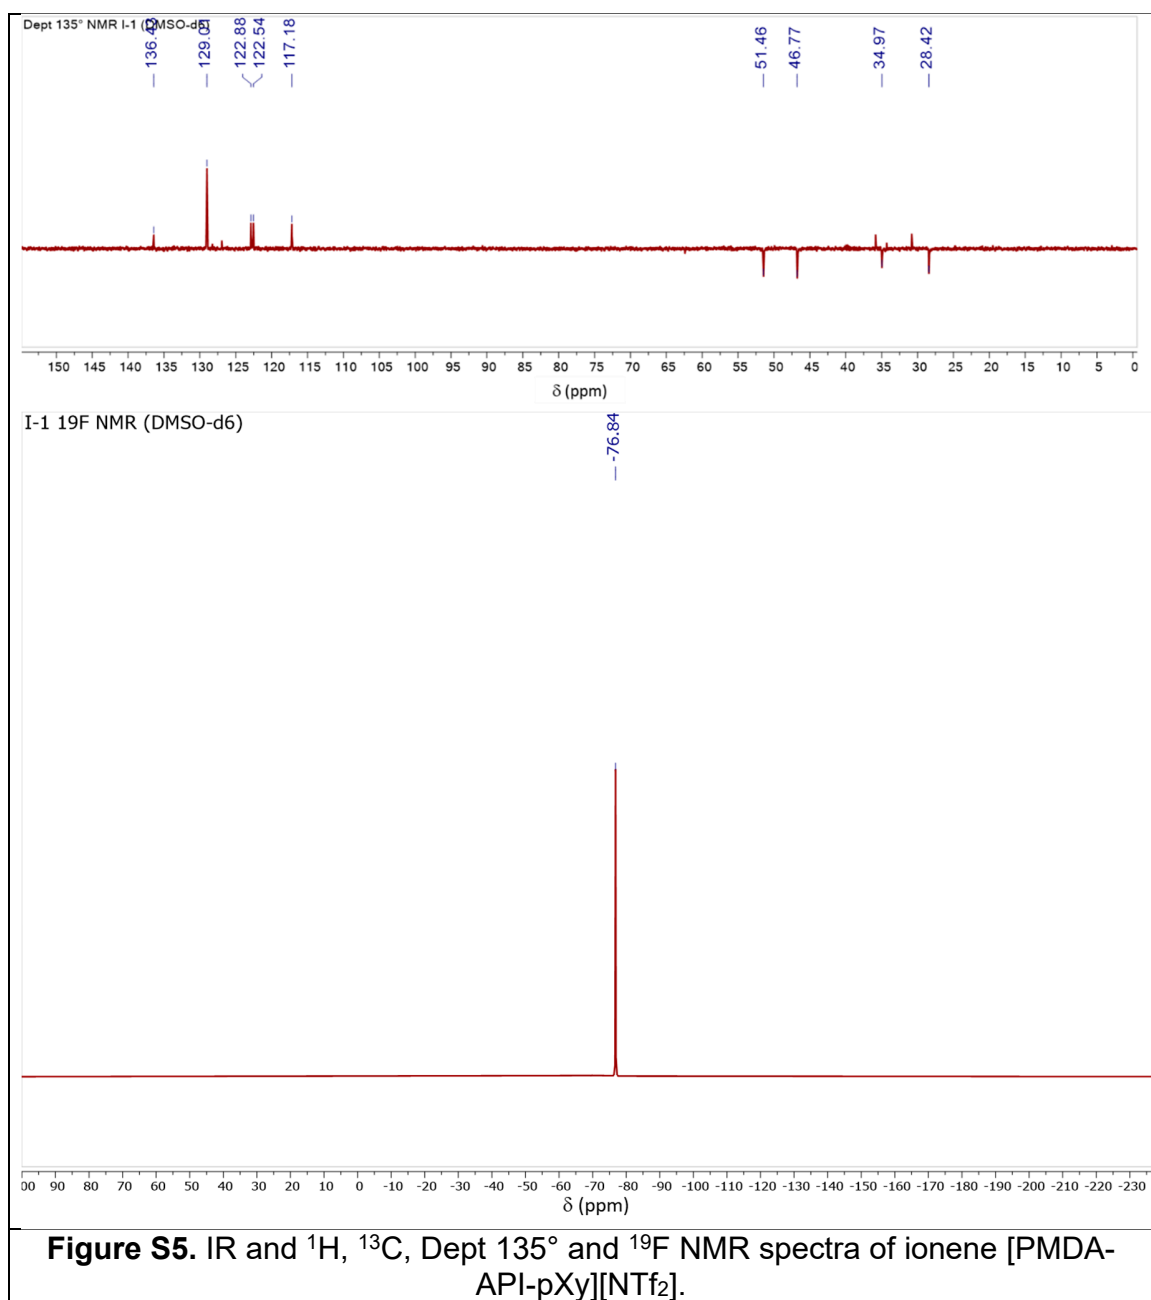

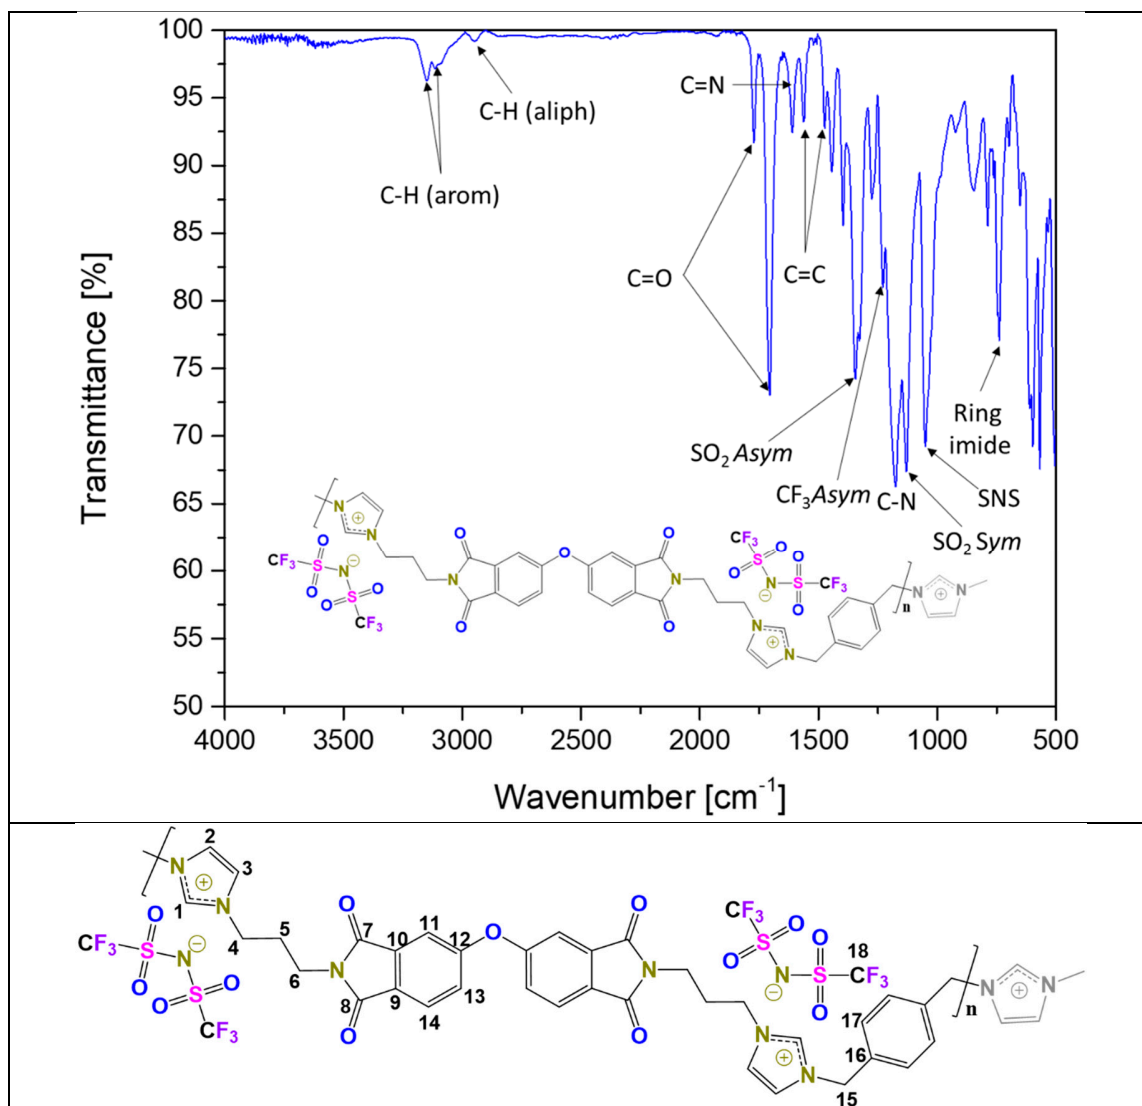



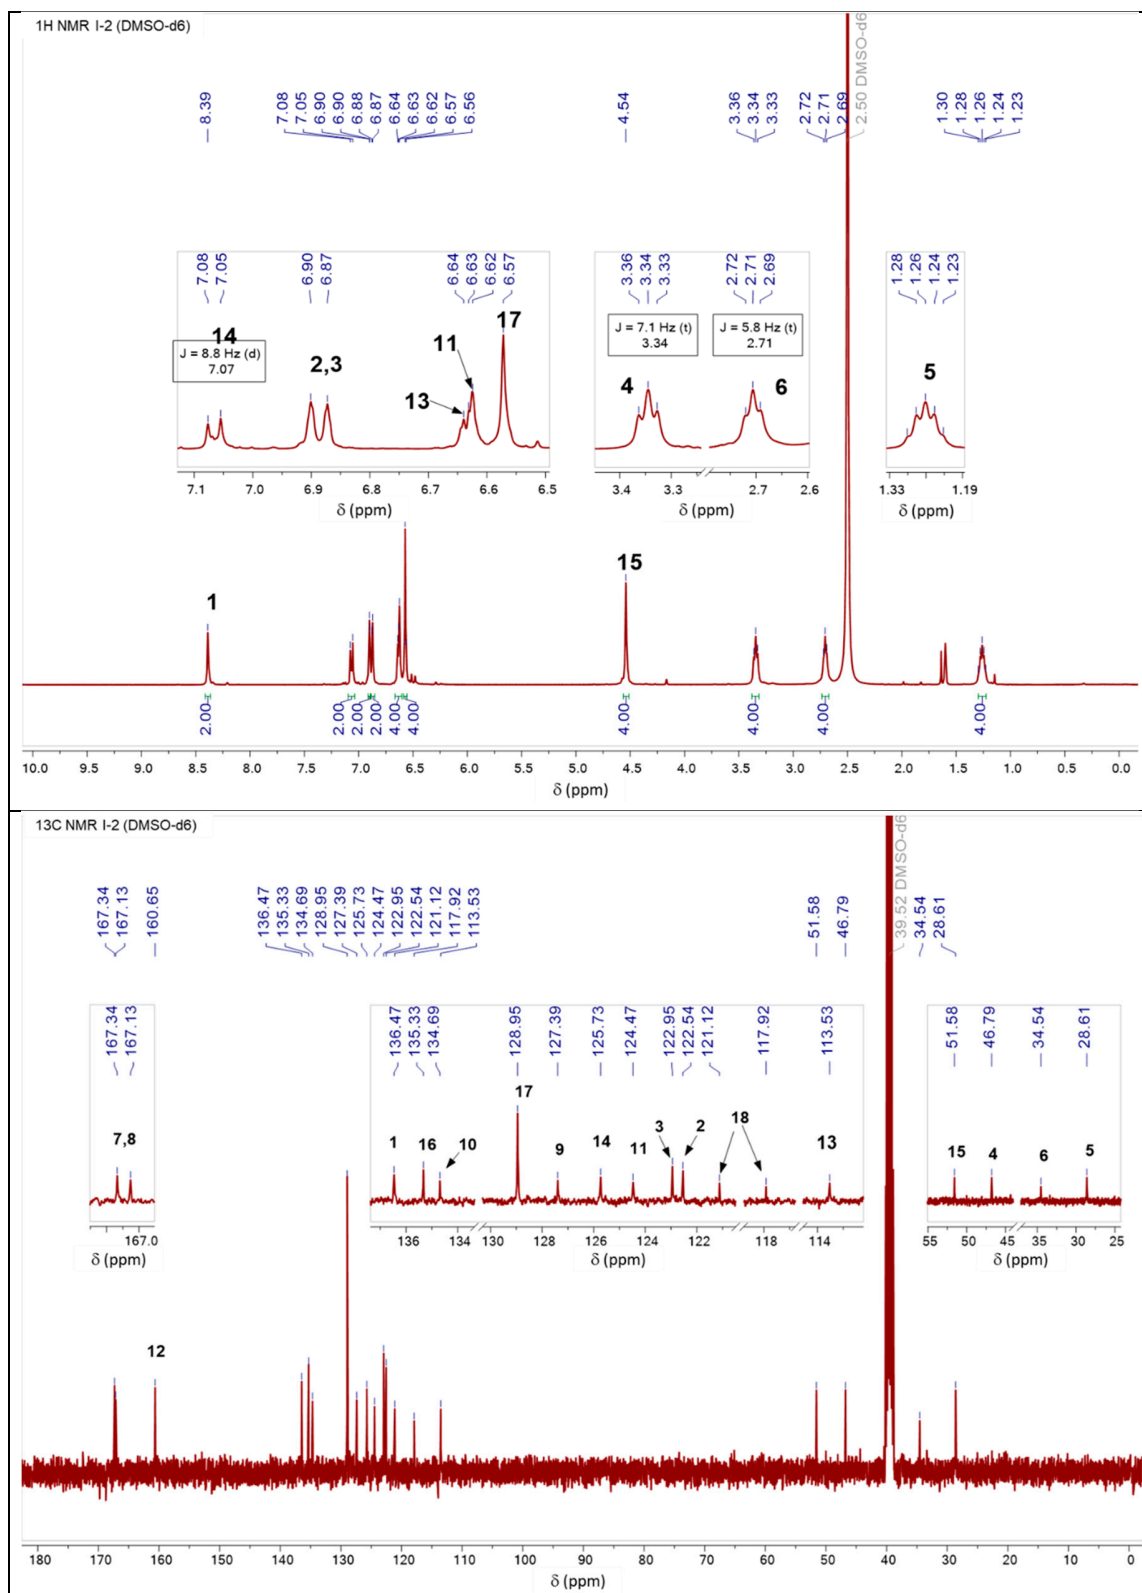

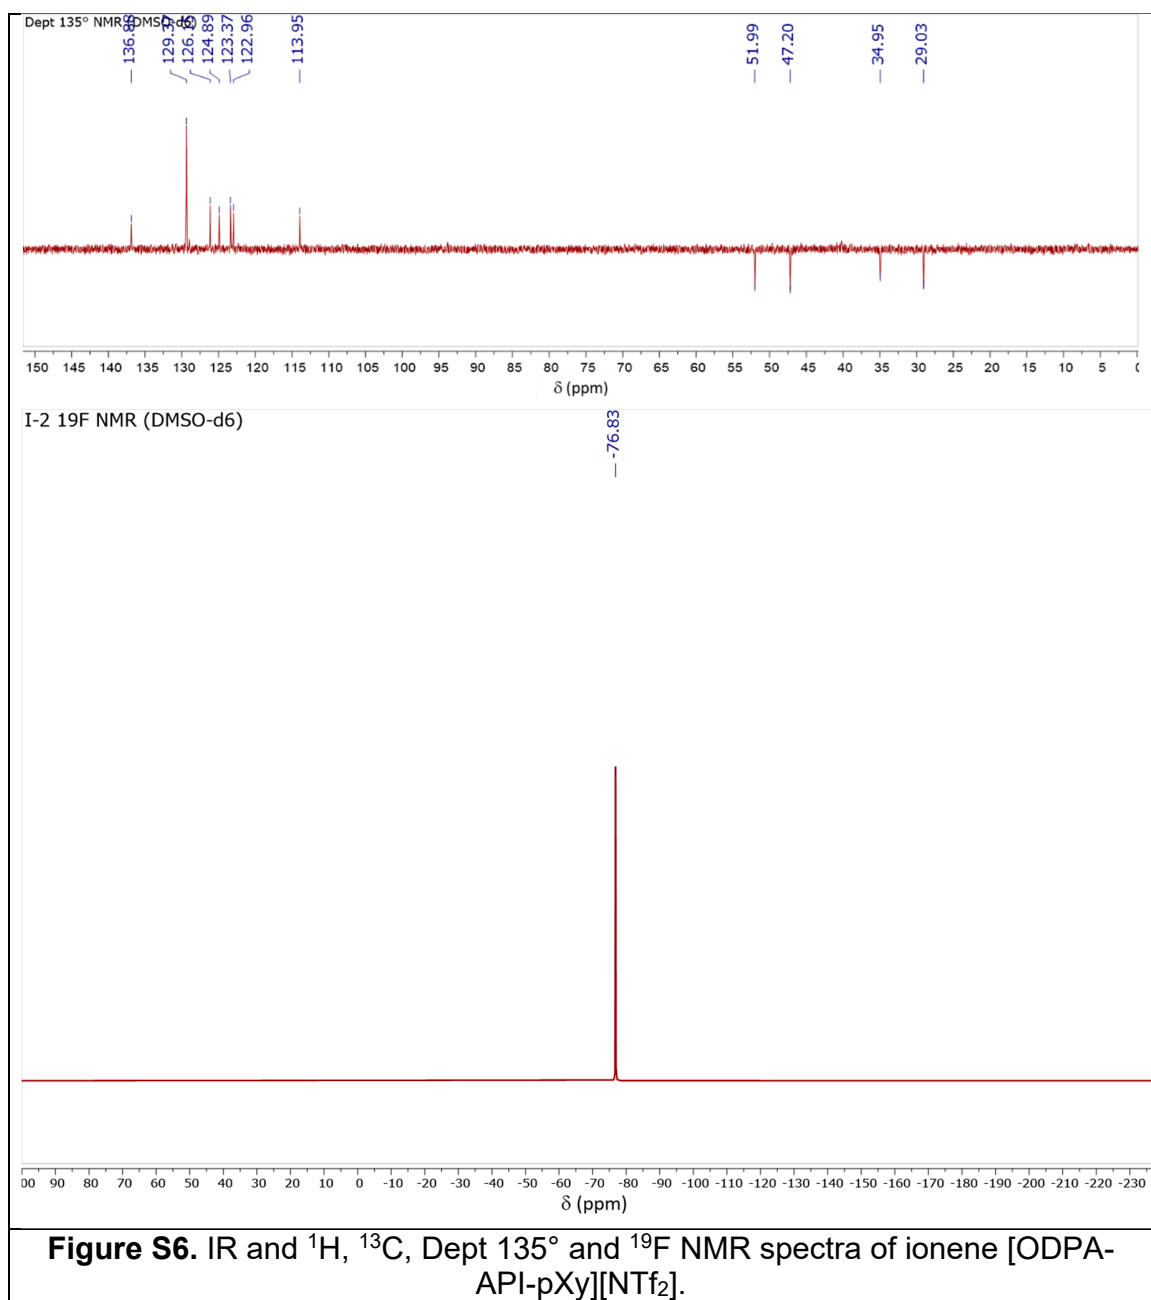

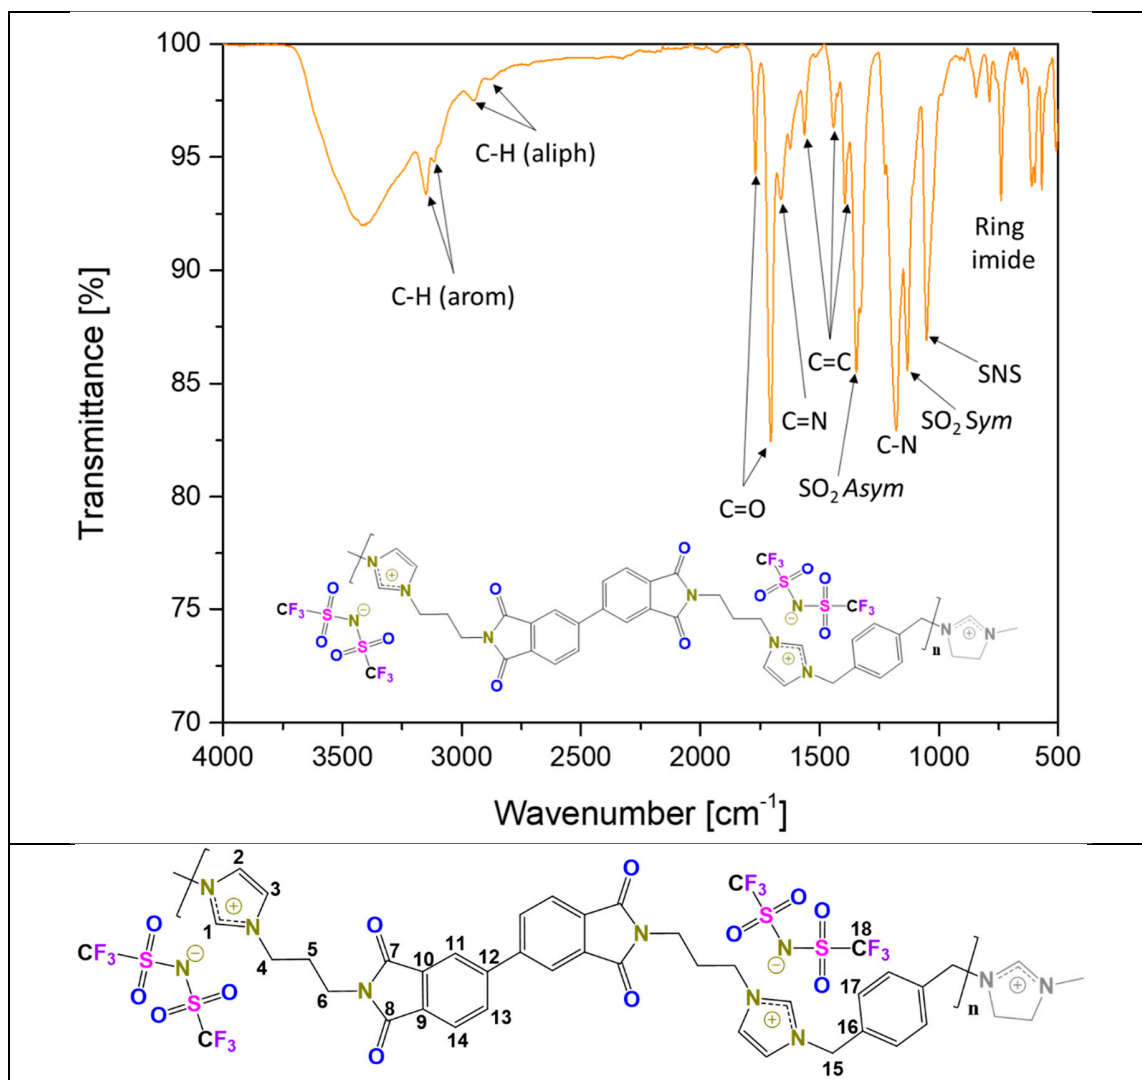

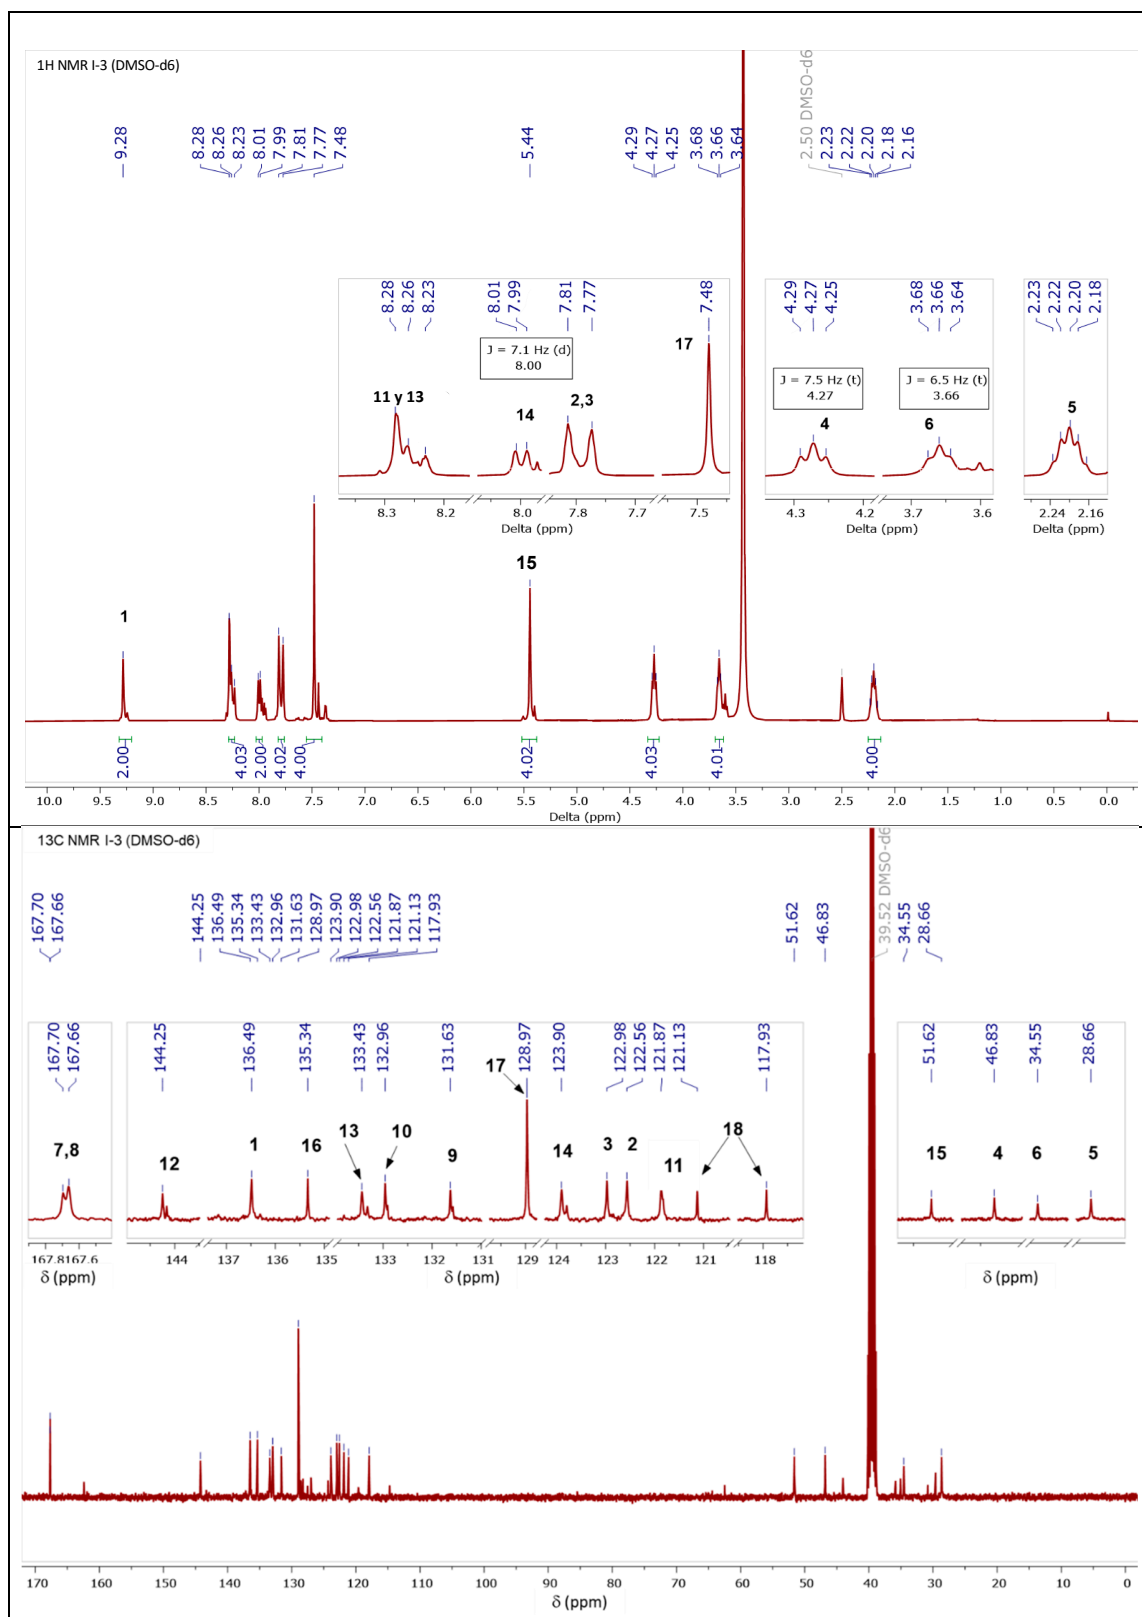

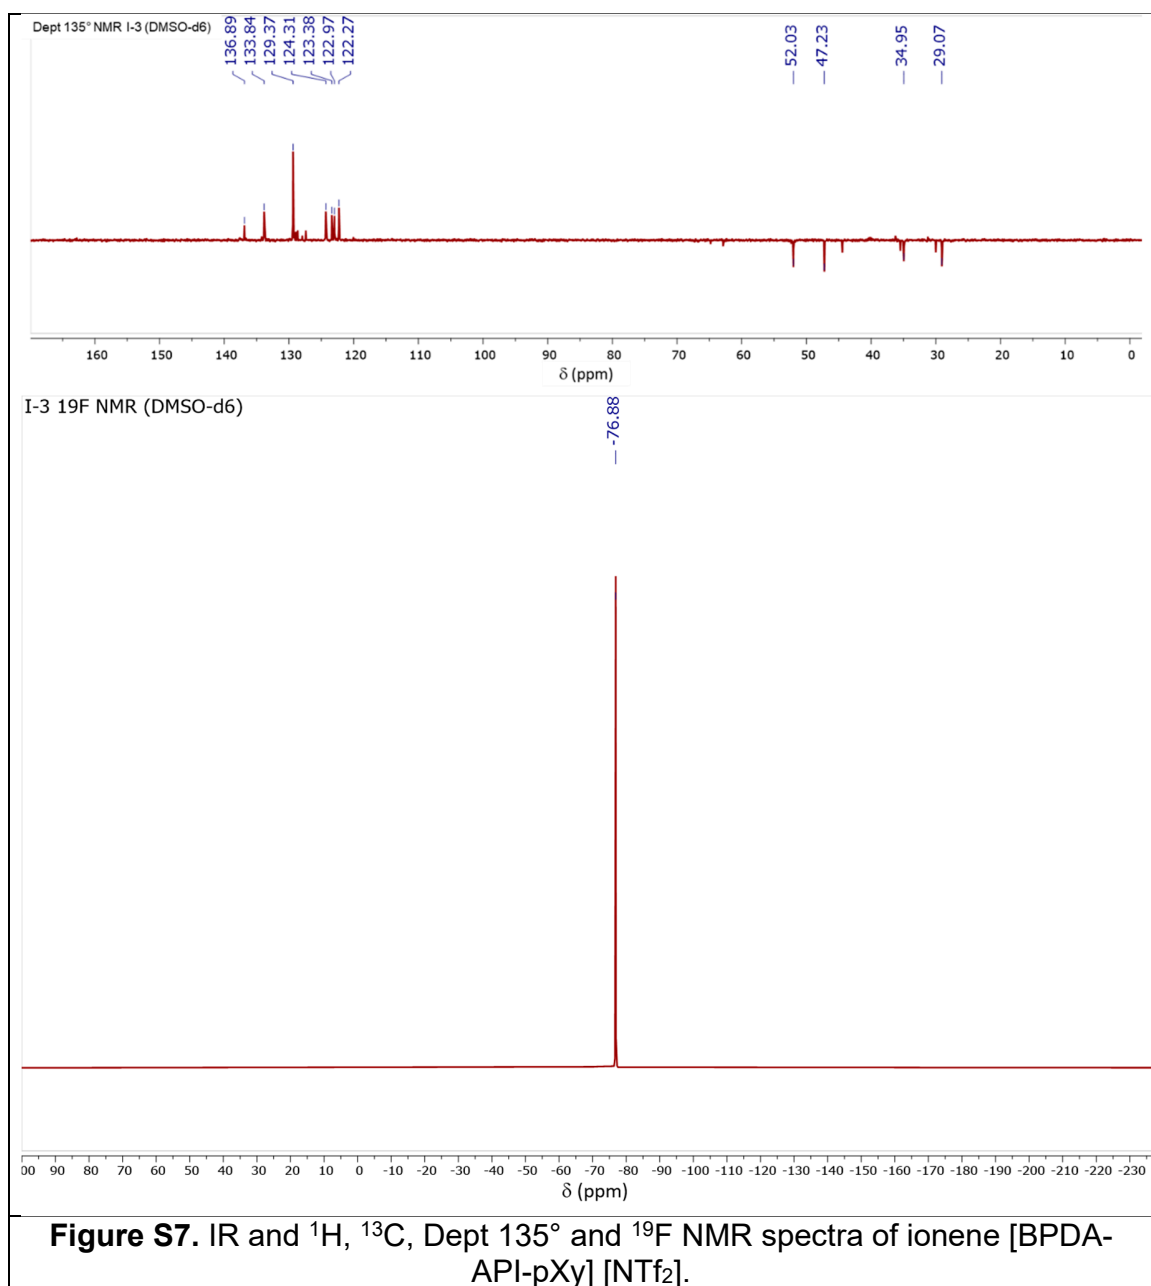

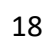

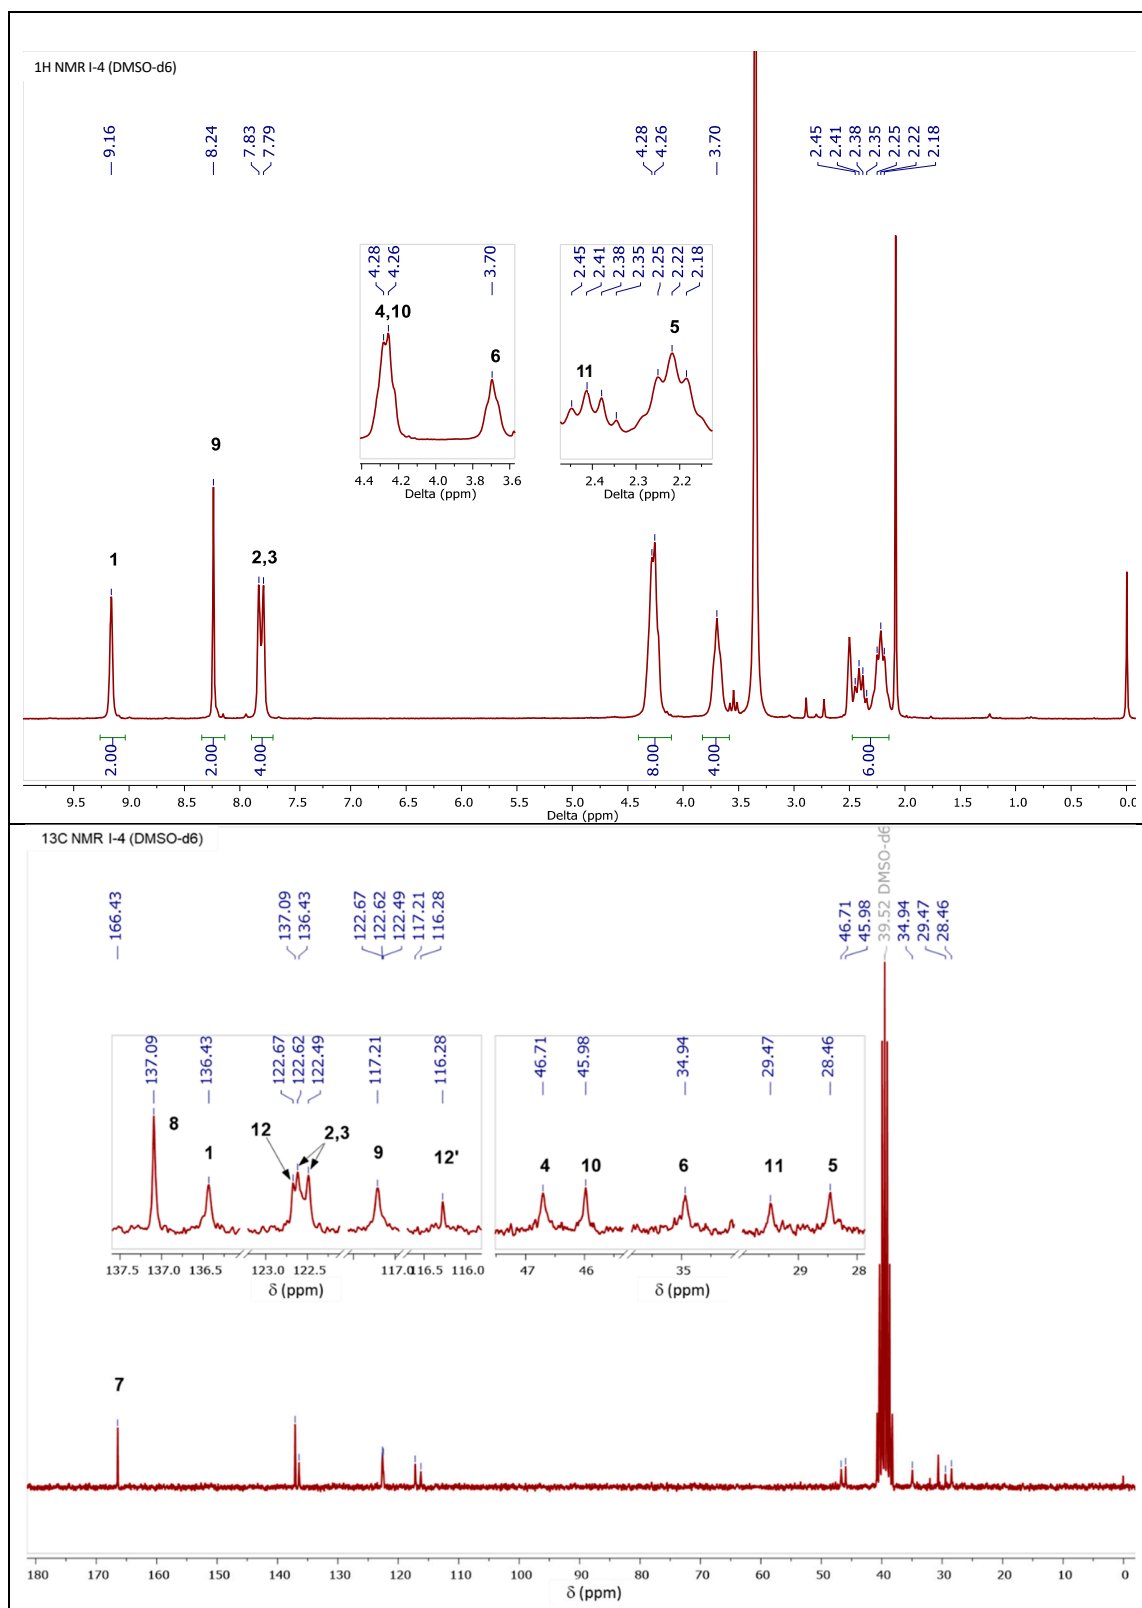

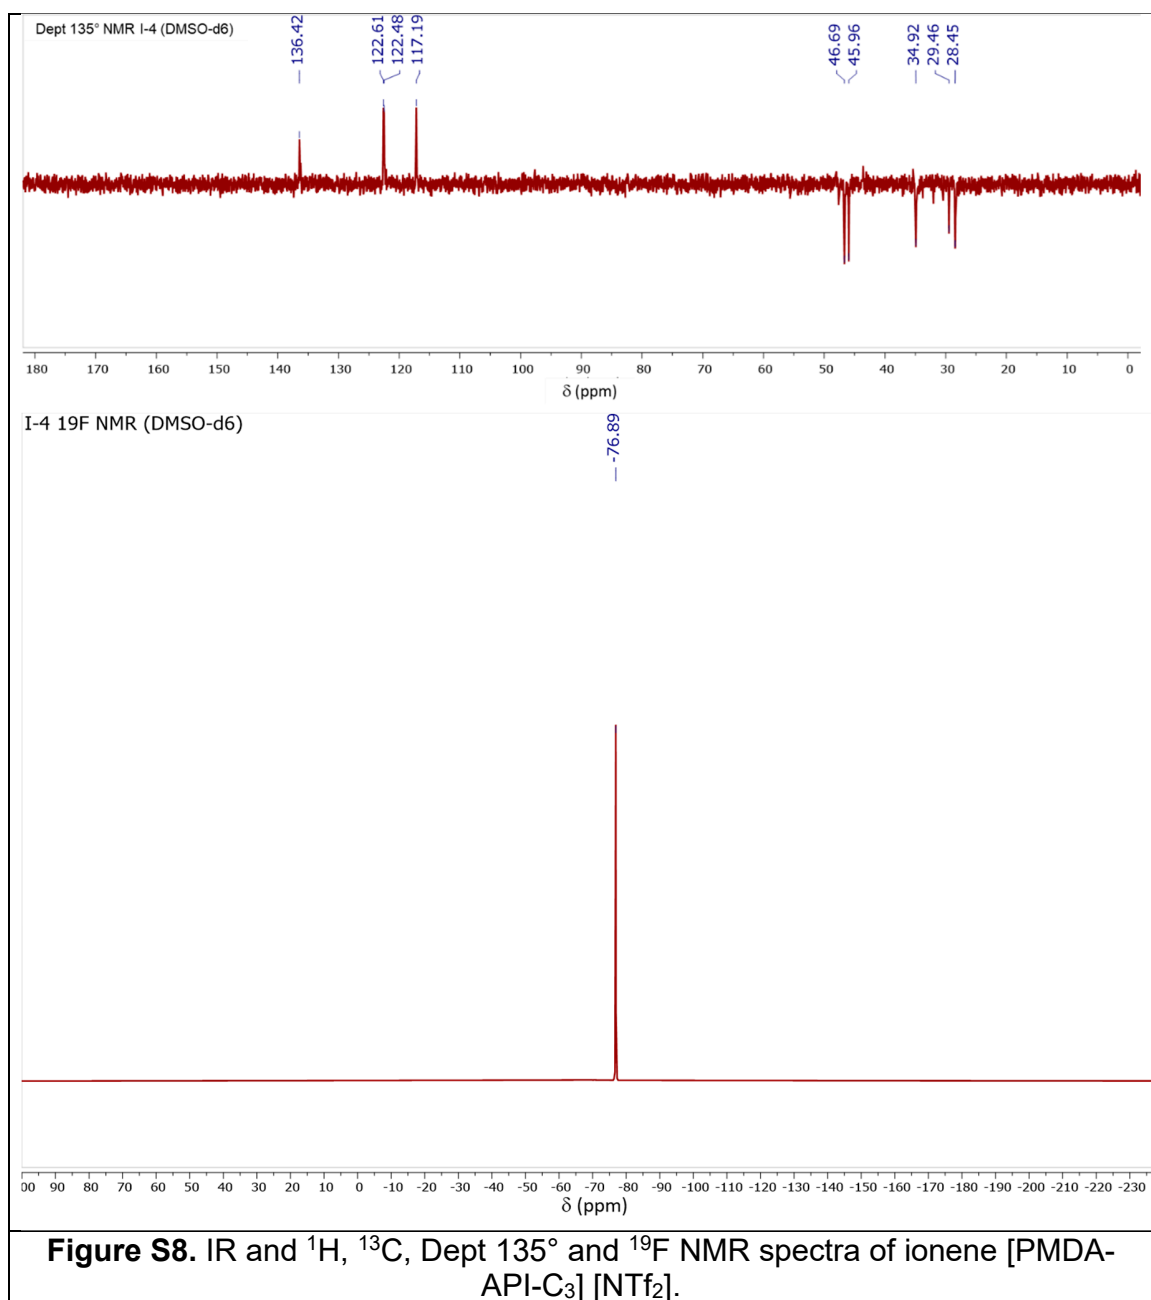



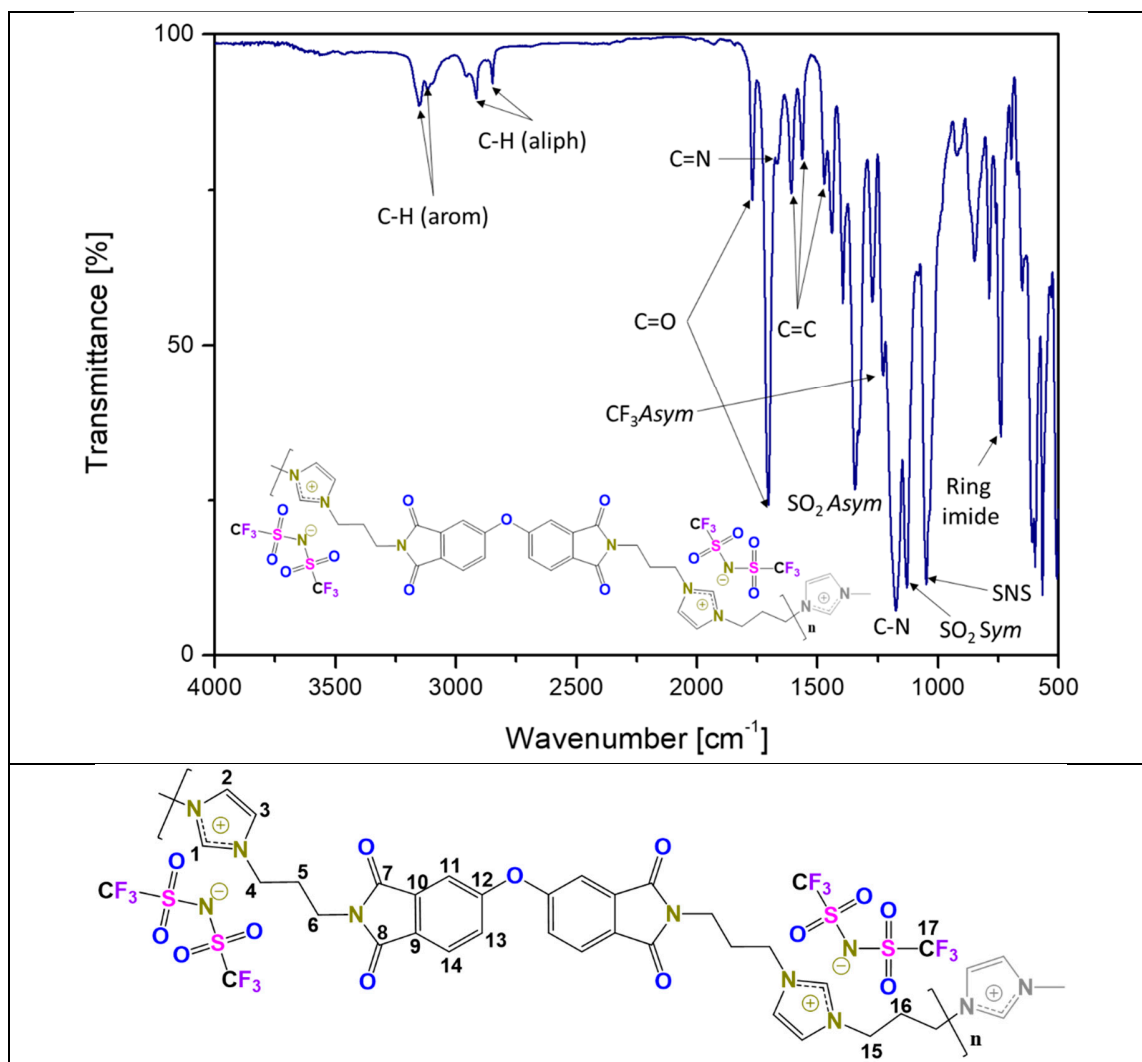

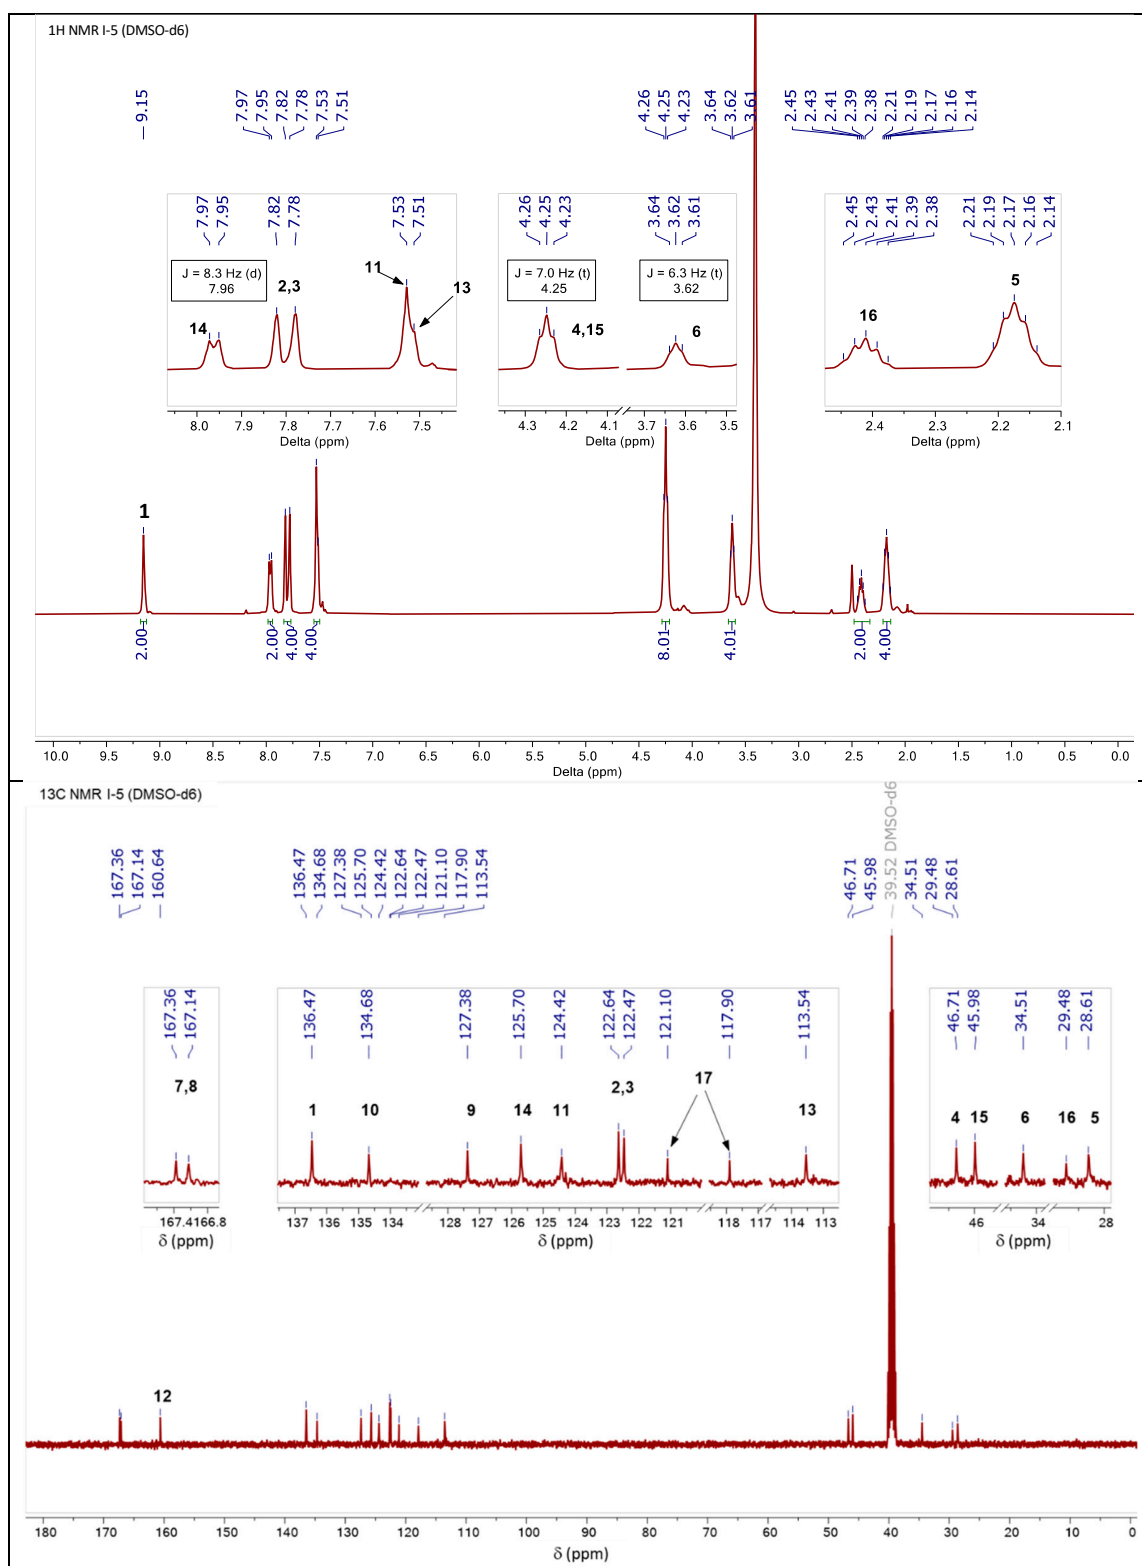

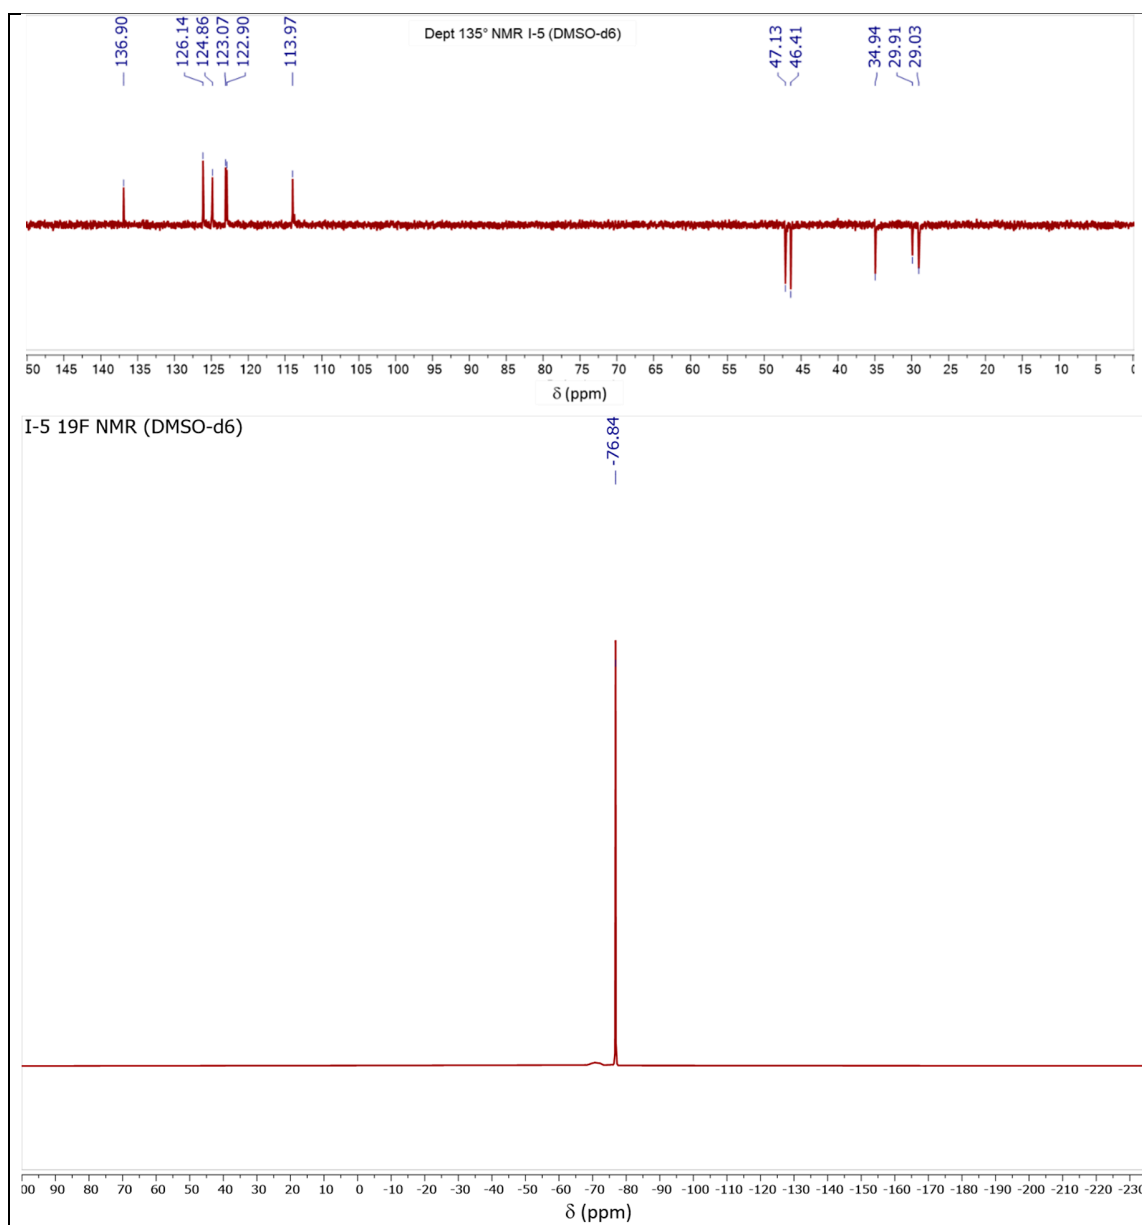

**Figure S9.** IR and <sup>1</sup>H, <sup>13</sup>C, Dept 135° and <sup>19</sup>F NMR spectra of ionene [ODPA-API-C<sub>3</sub>] [NTf<sub>2</sub>].

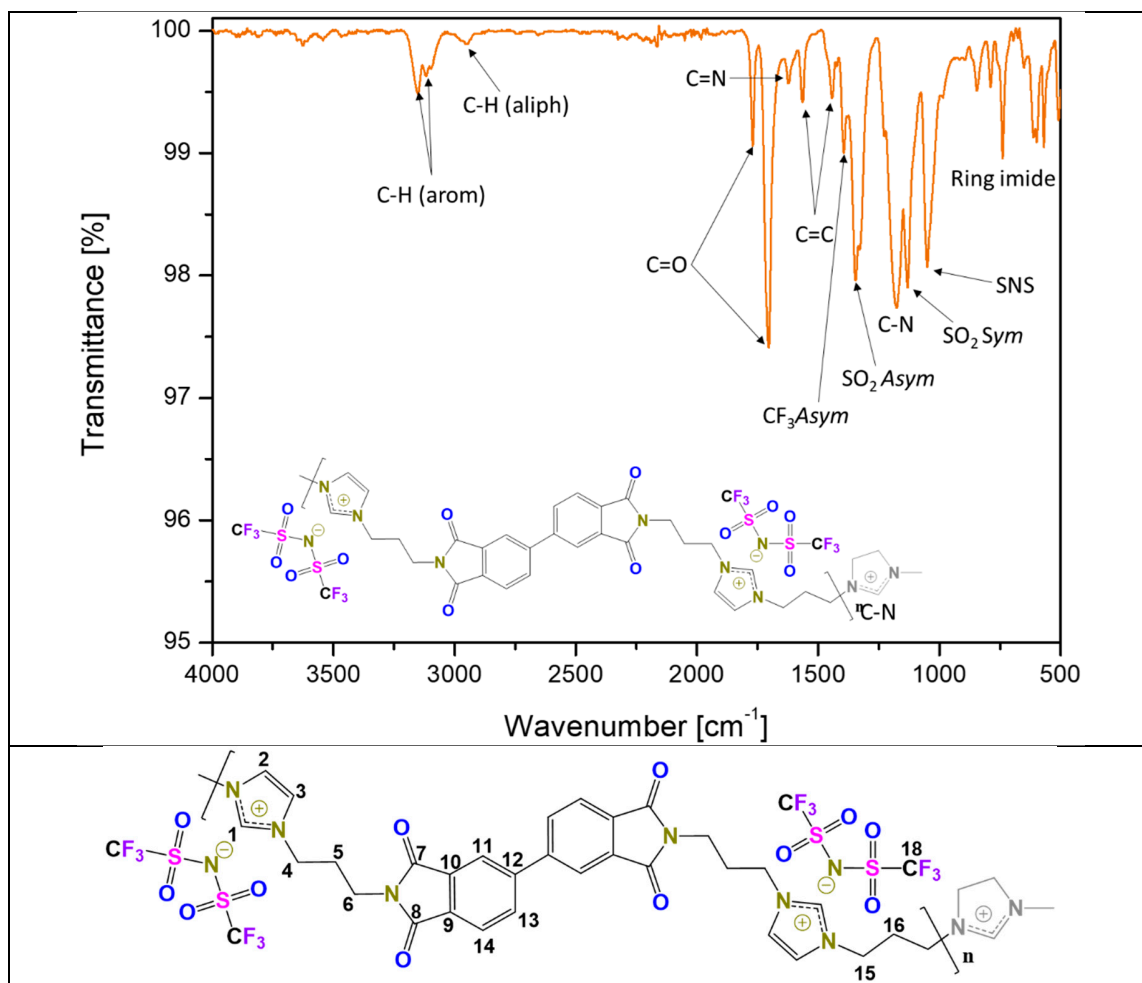

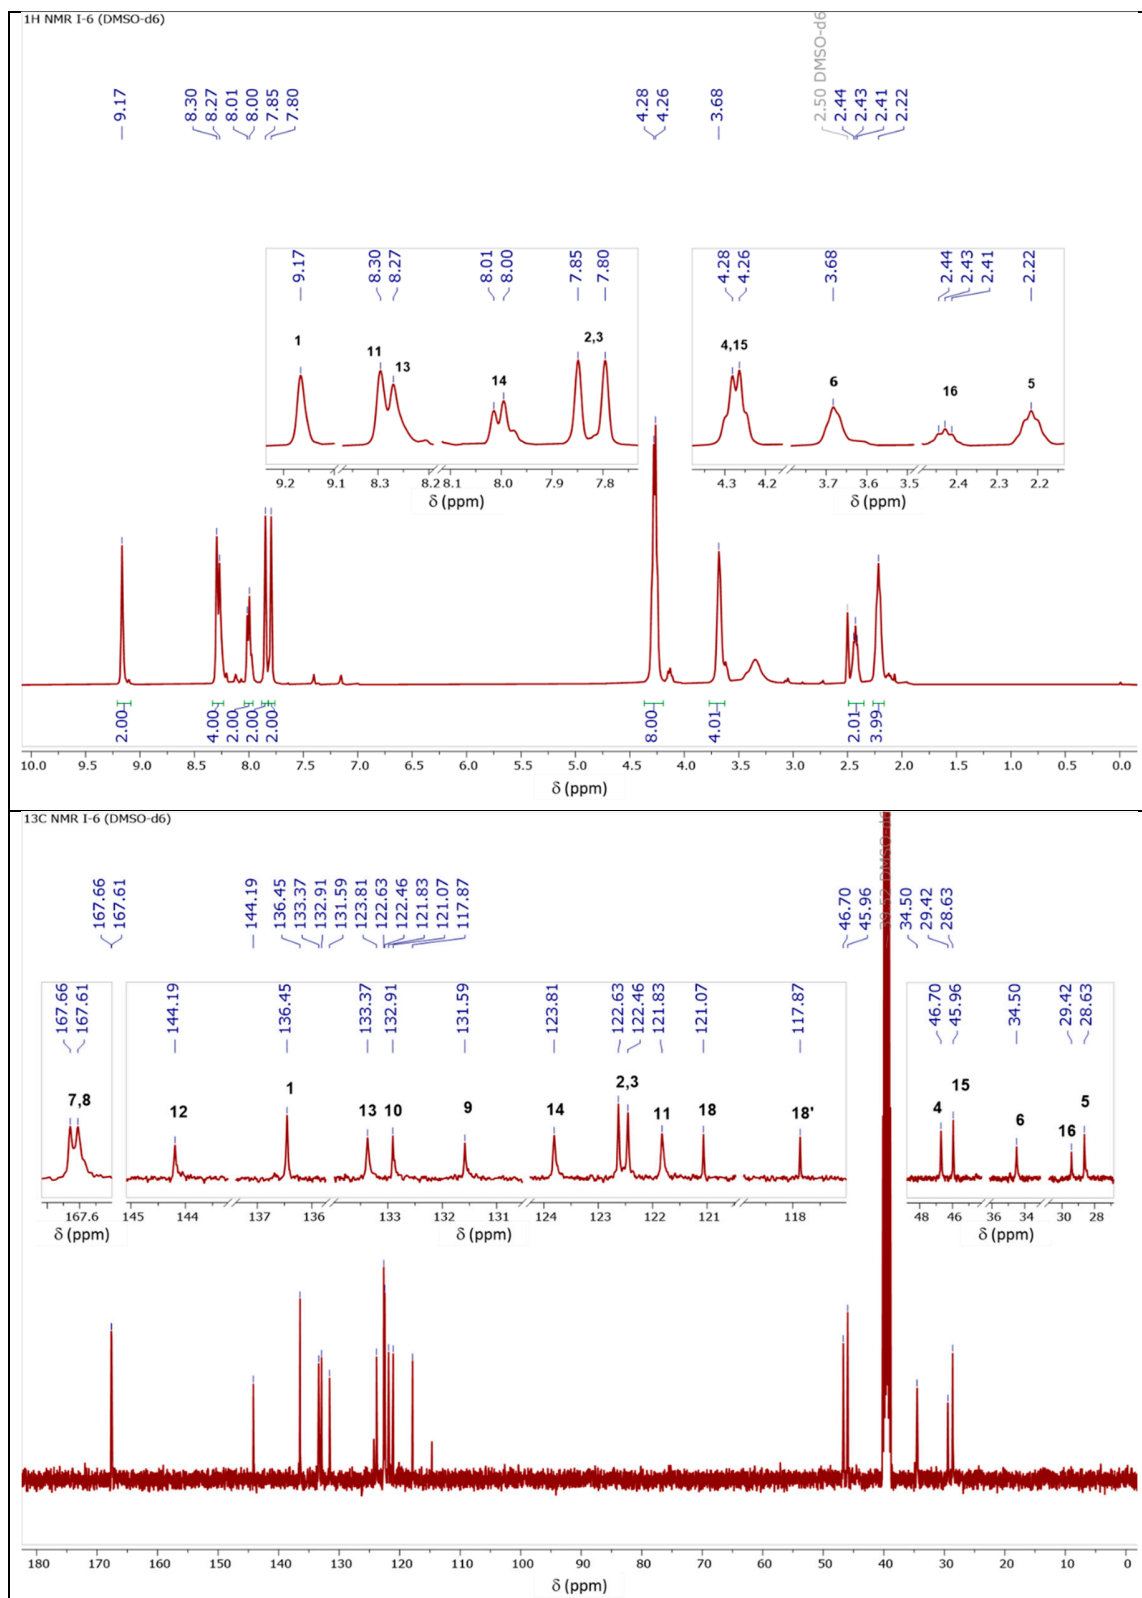

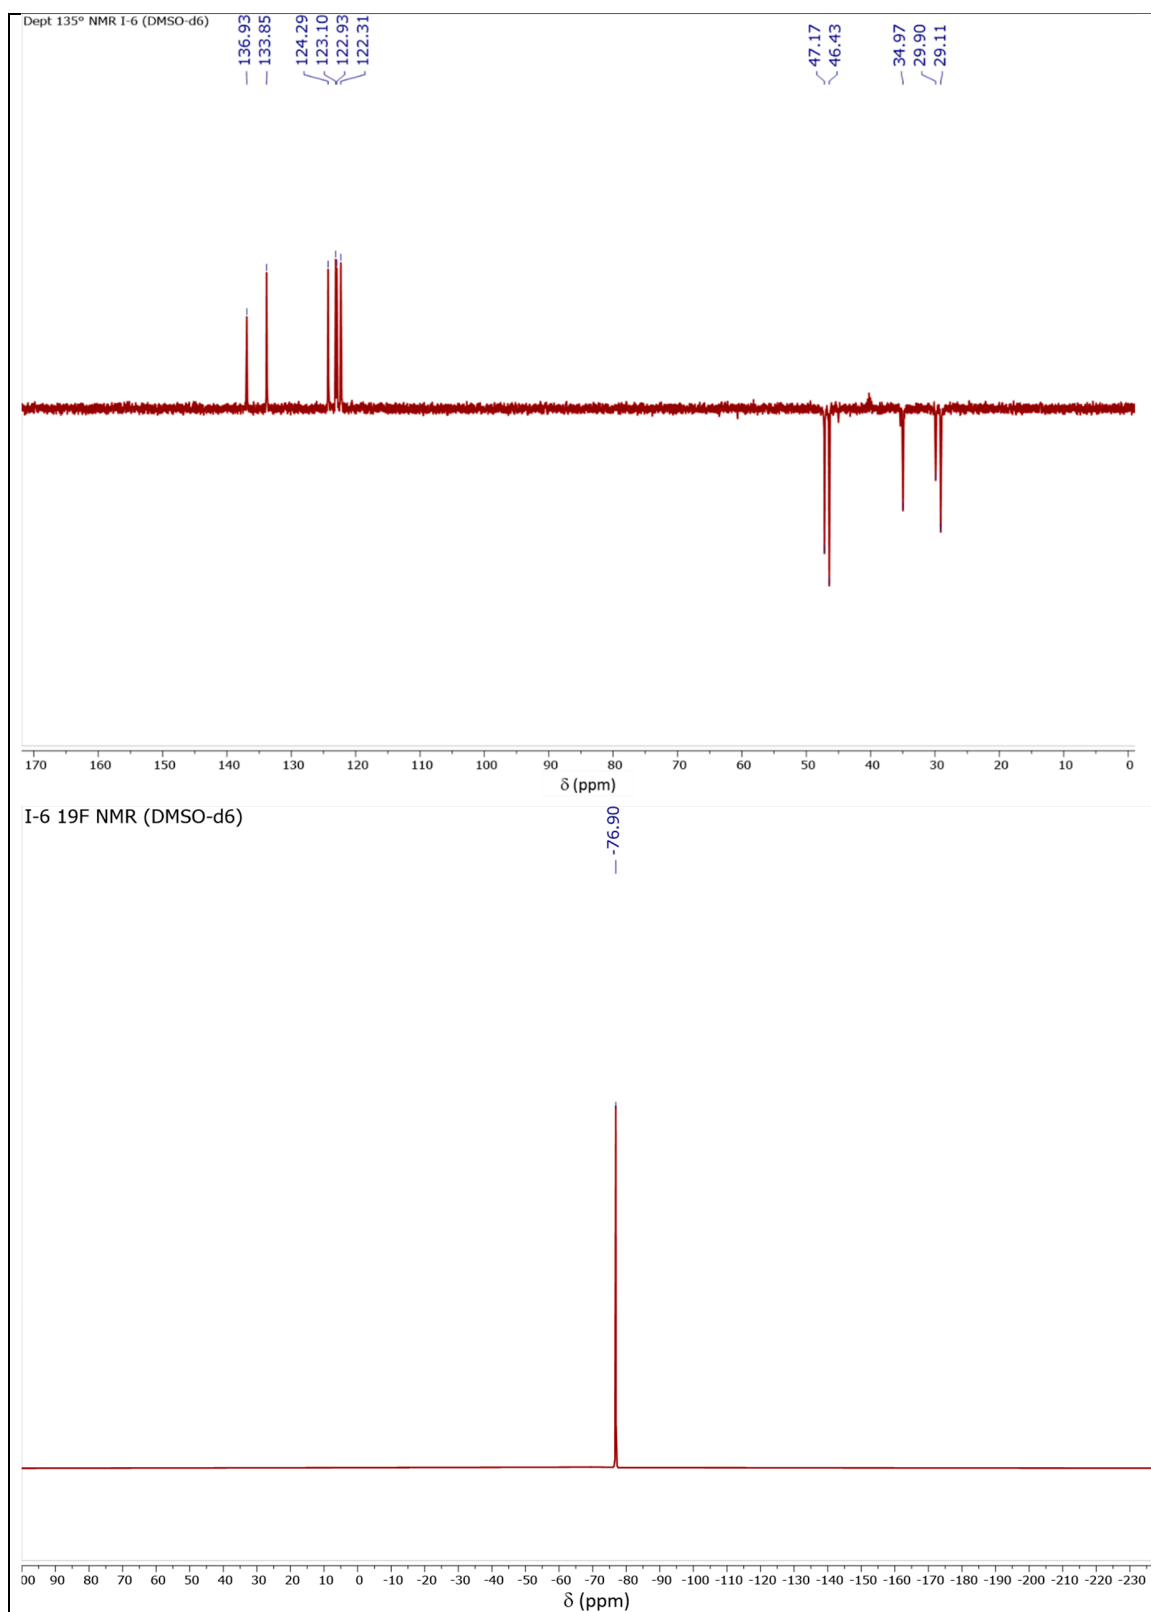

**Figure S10.** IR and  $^1\text{H}$ ,  $^{13}\text{C}$ , Dept 135° and  $^{19}\text{F}$  NMR spectra of ionene [BPDA-API-C<sub>3</sub>] [NTf<sub>2</sub>].

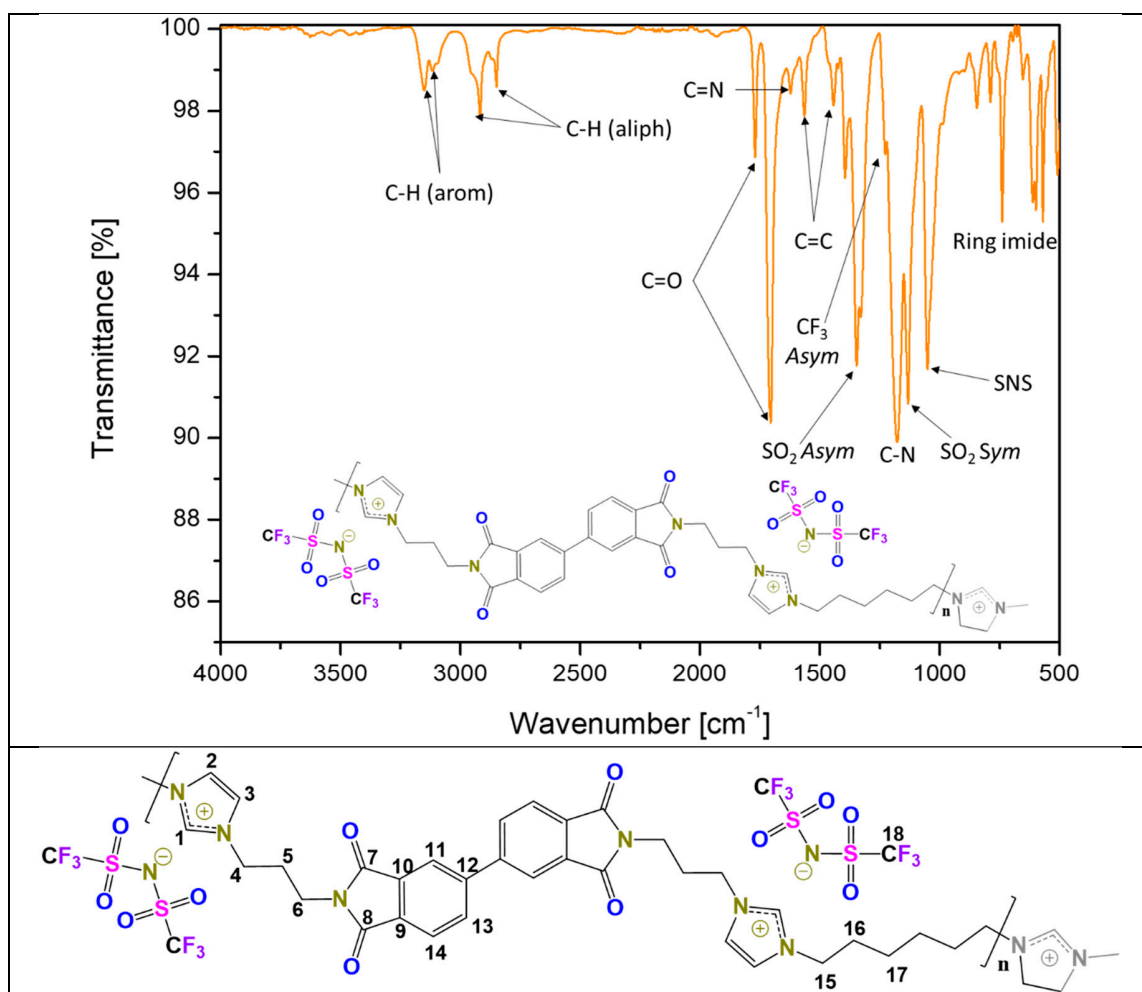

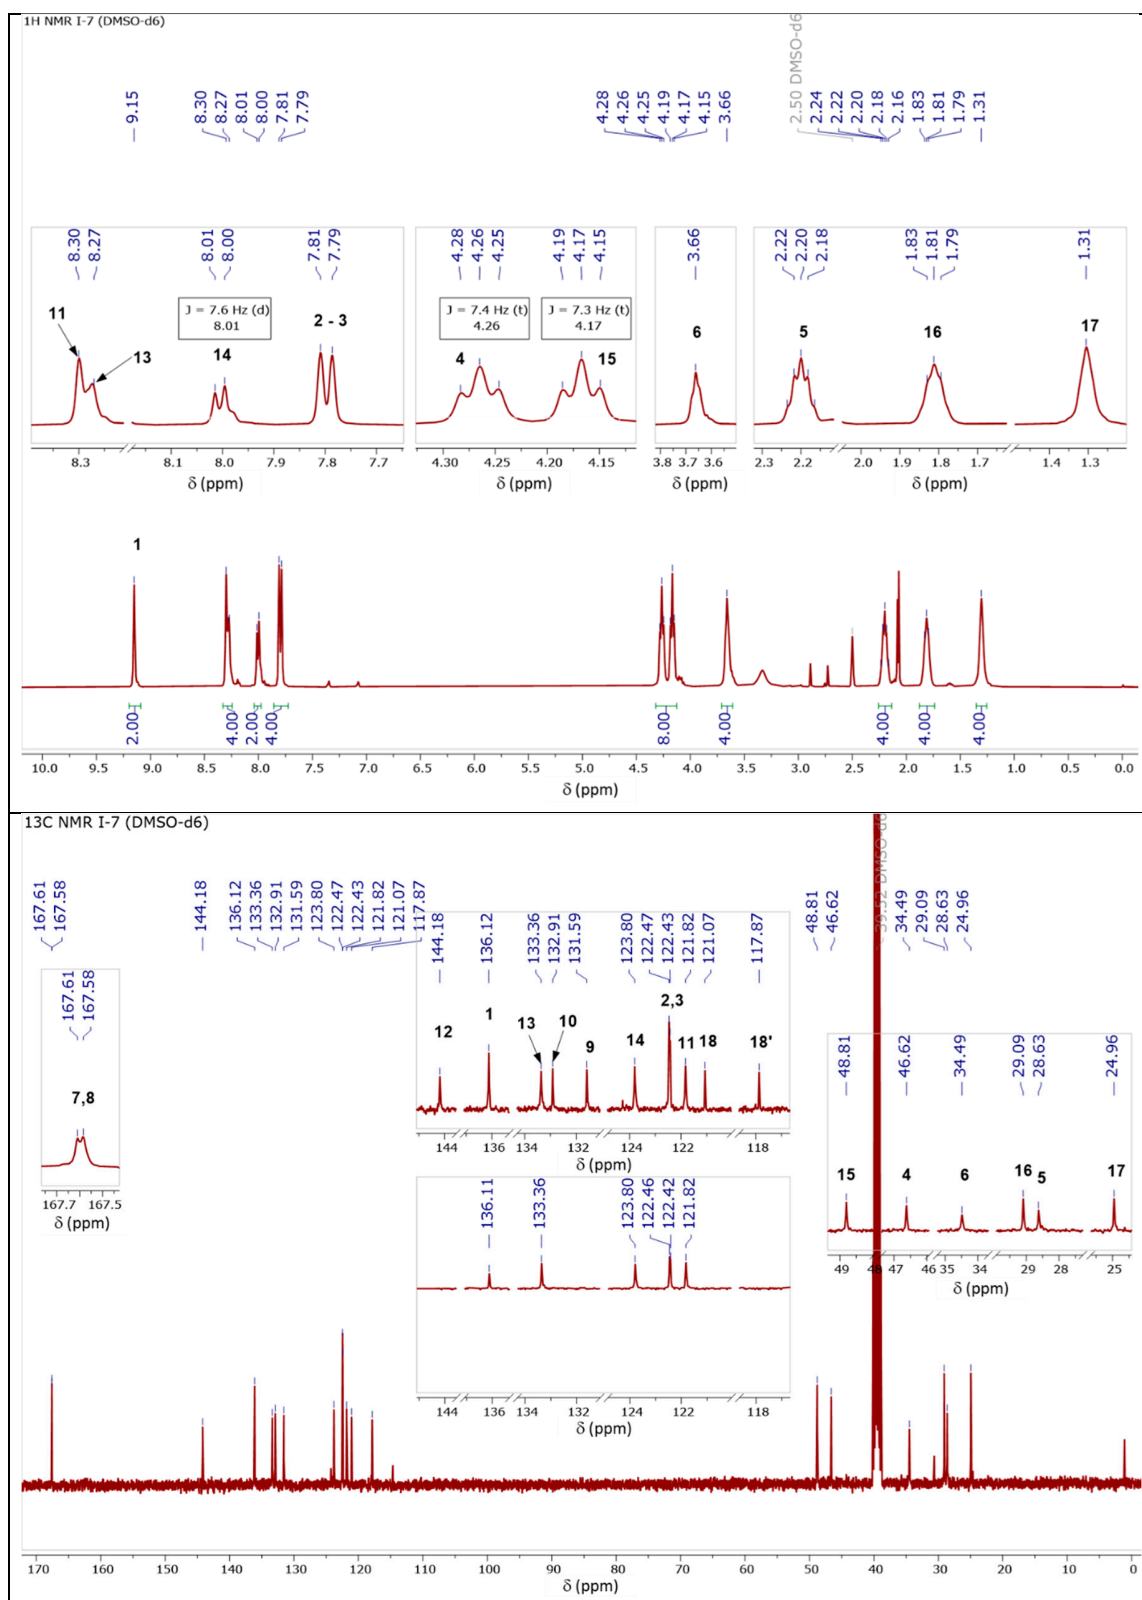



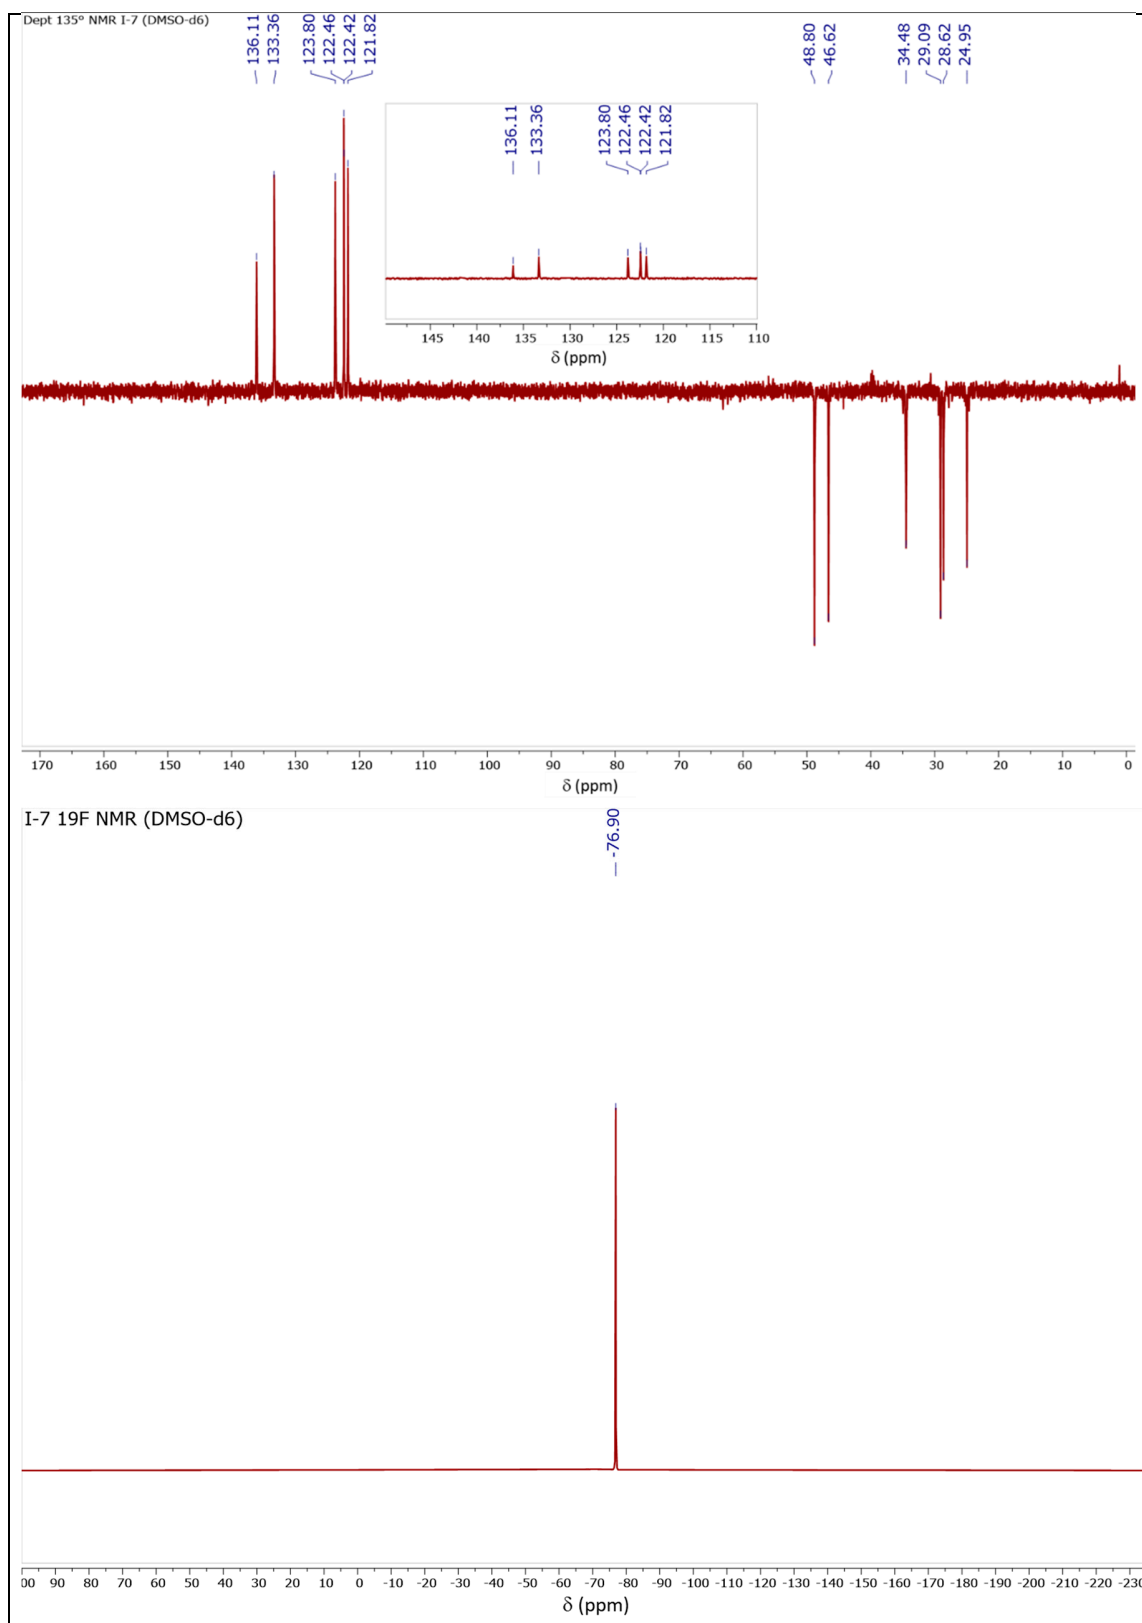

**Figure S11.** IR and  $^1\text{H}$ ,  $^{13}\text{C}$ , Dept 135° and  $^{19}\text{F}$  NMR spectra of ionene [BPDA-API-C<sub>6</sub>] [NTf<sub>2</sub>].

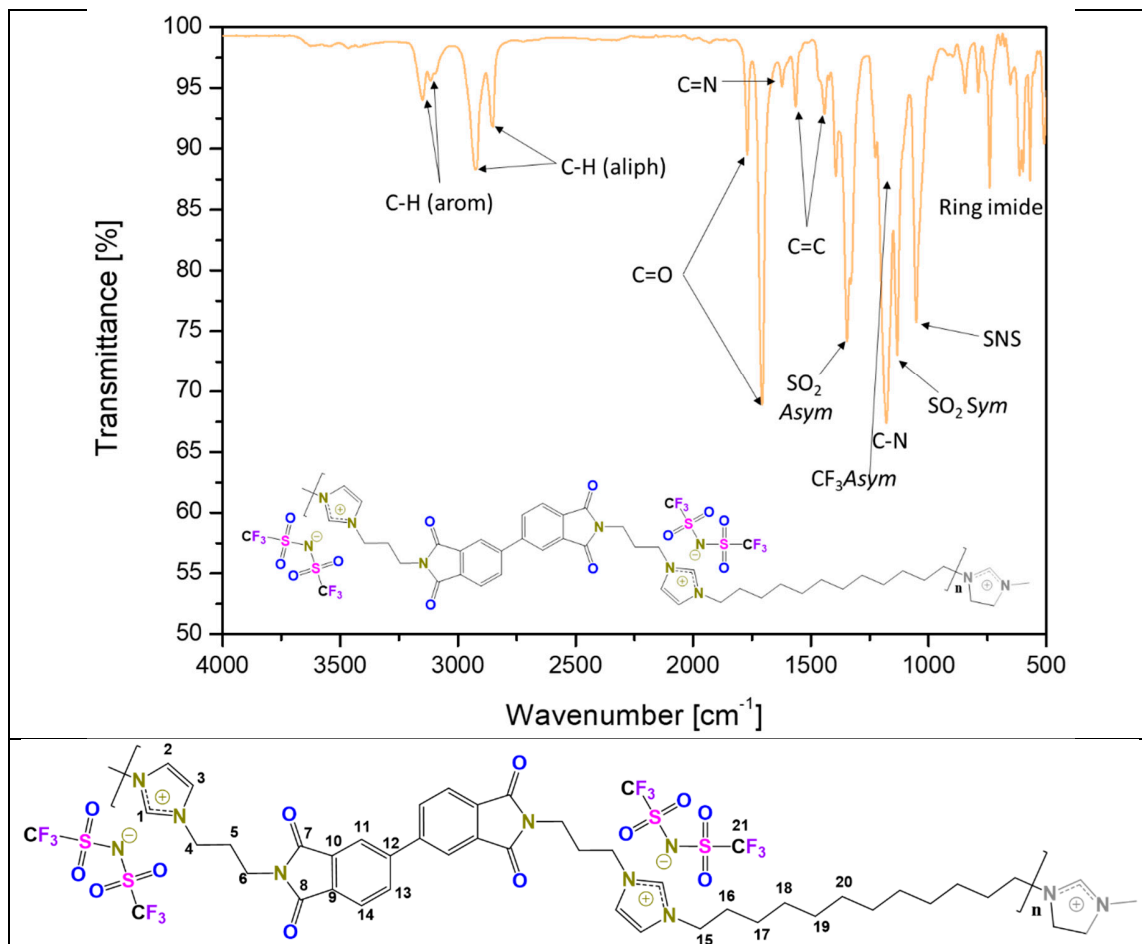

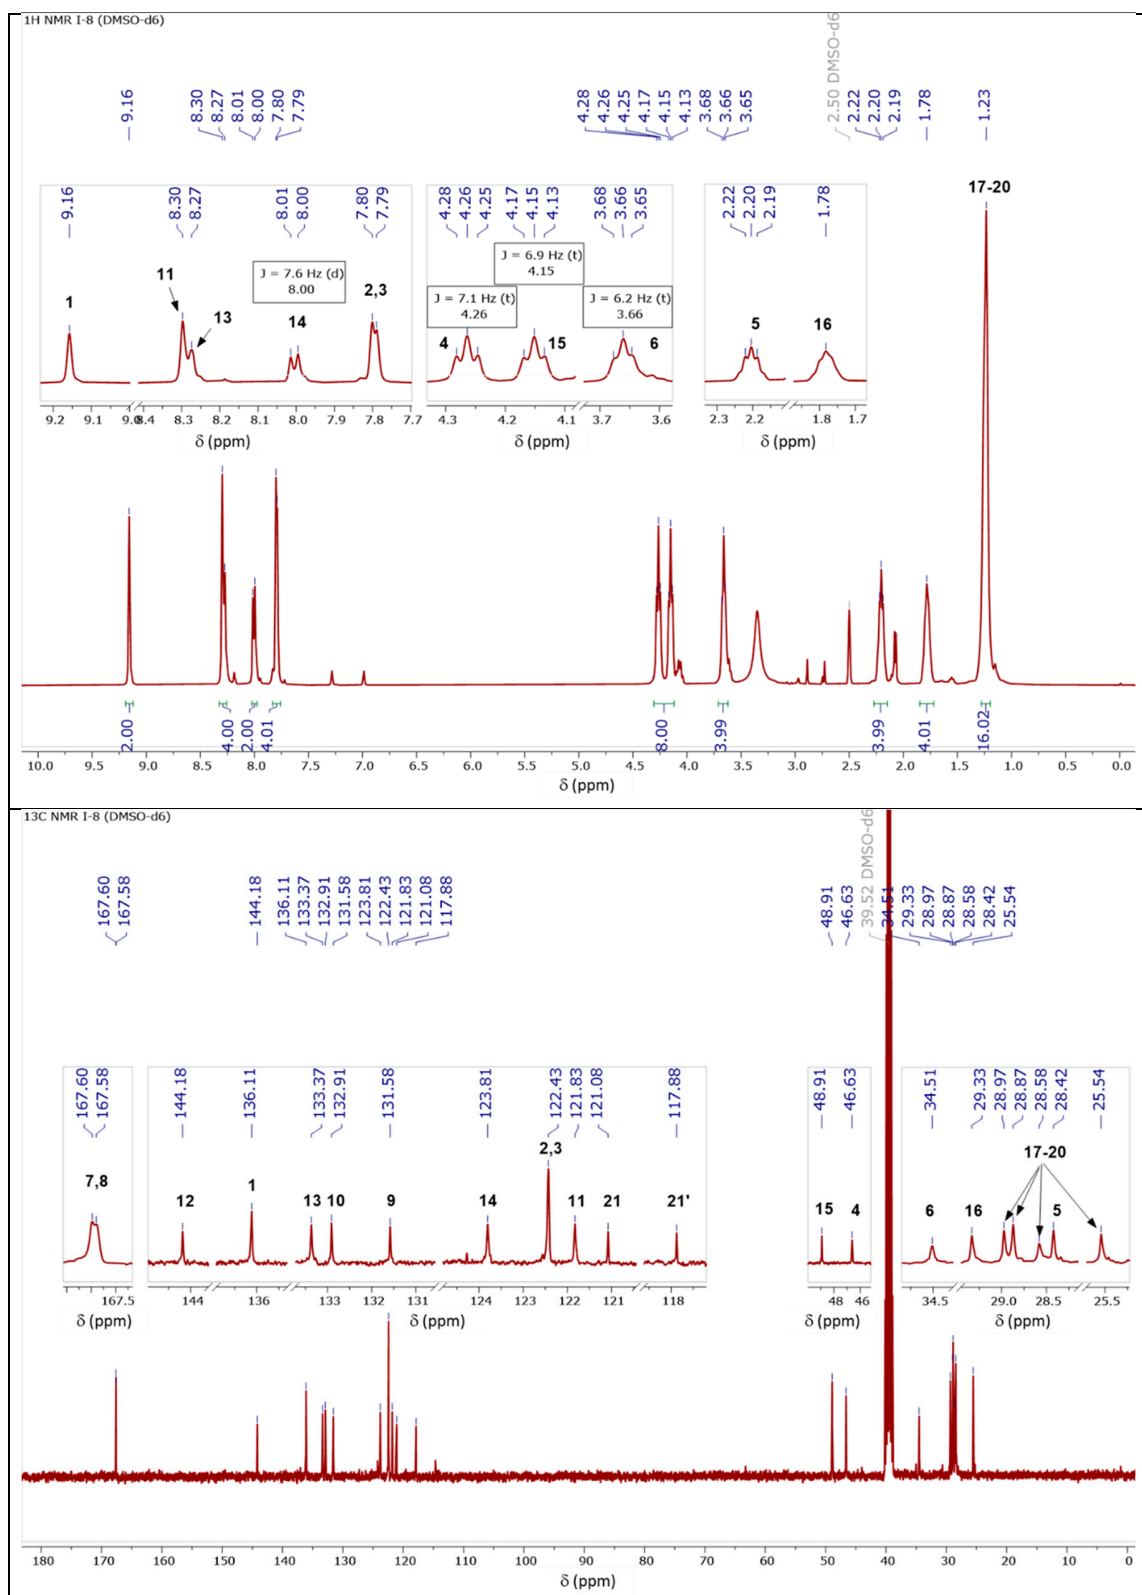

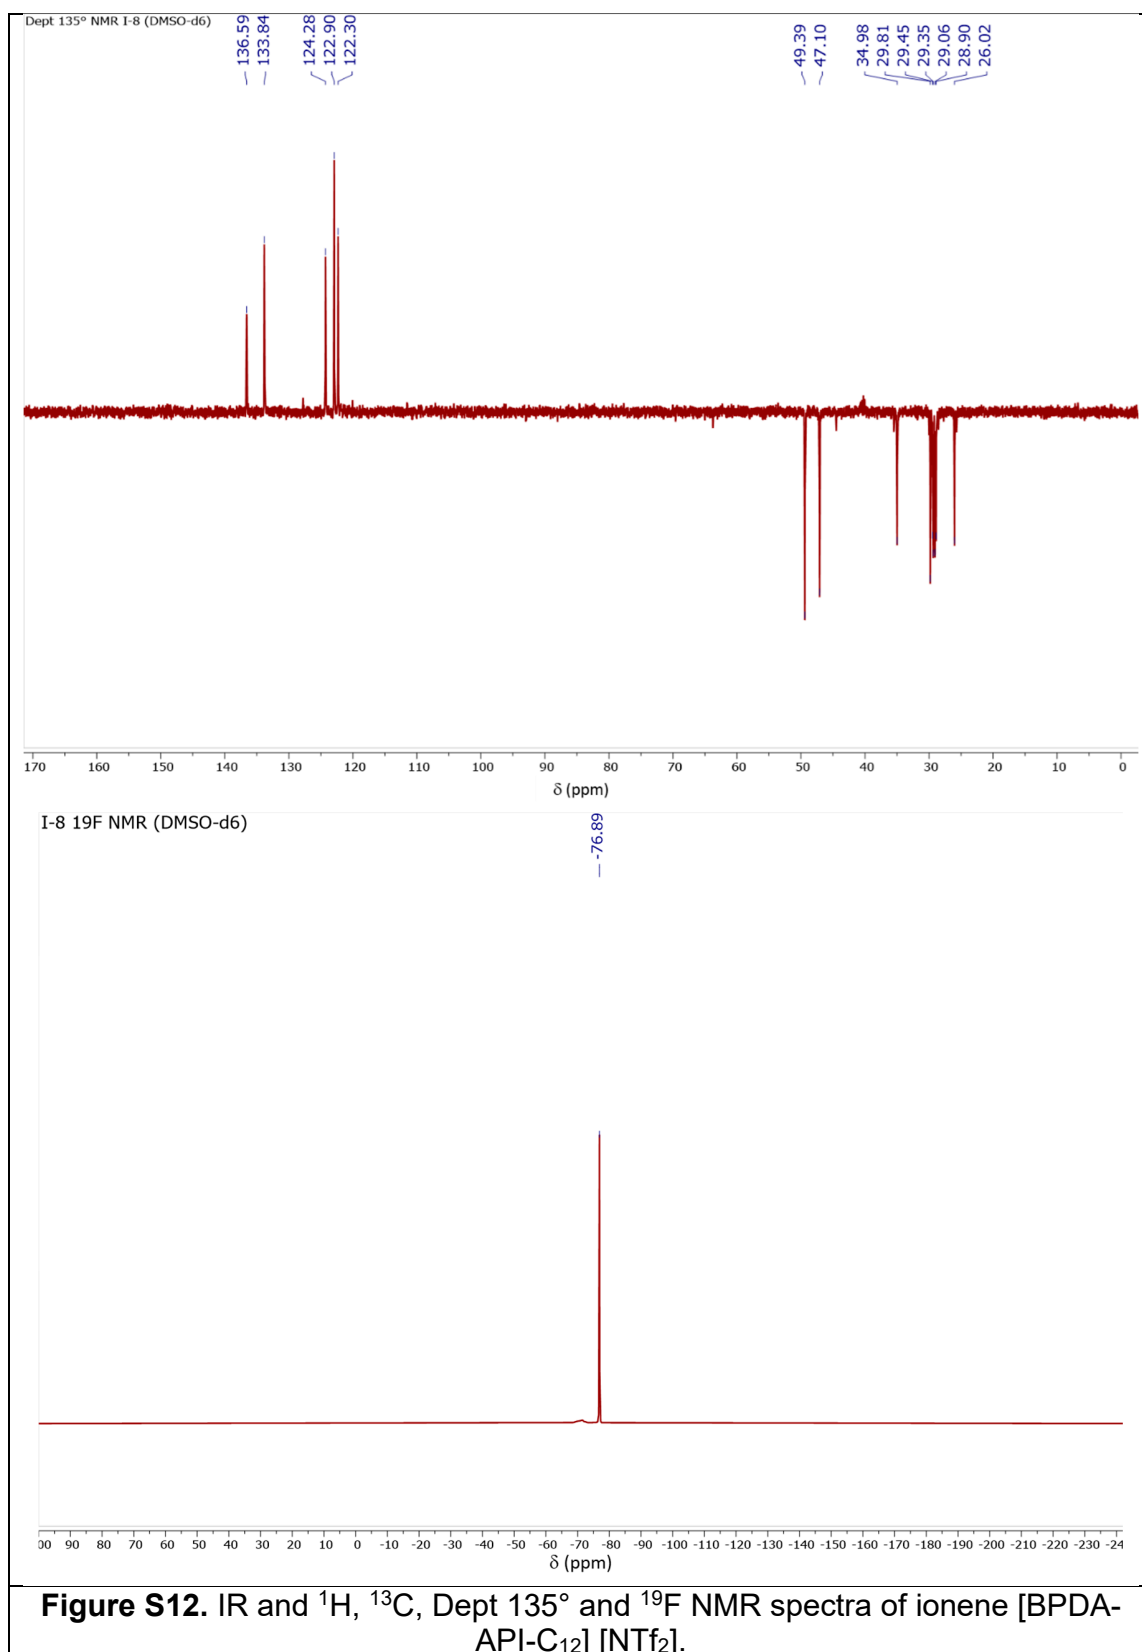

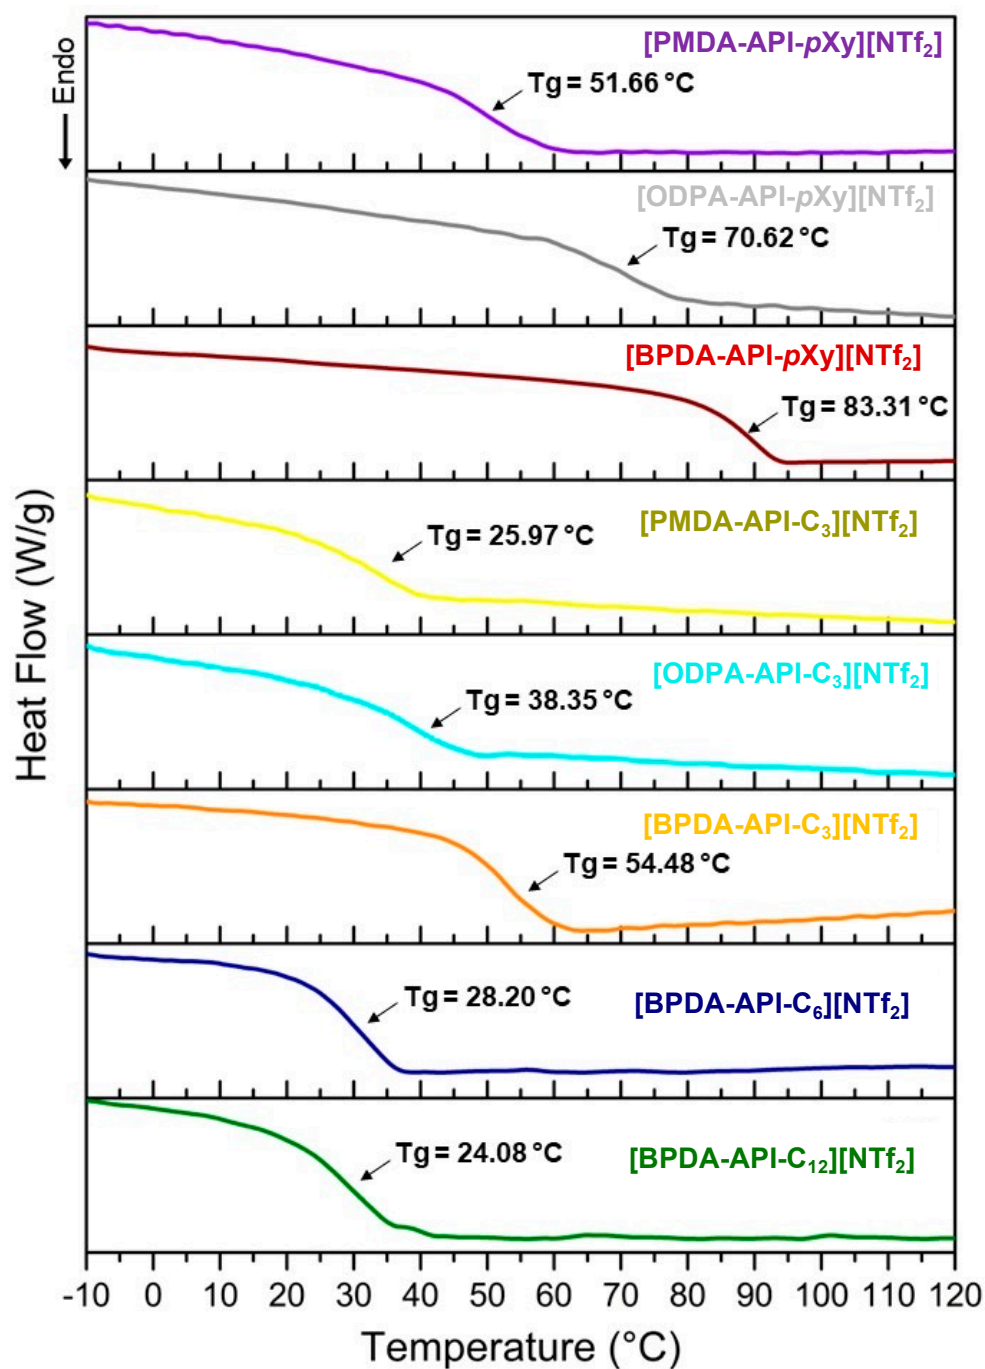

**Figure S13.** Heating curves of the DSC assays of the synthesized ionenes.

|                                                | Water                                                                               | CH <sub>2</sub> l <sub>2</sub>                                                       |
|------------------------------------------------|-------------------------------------------------------------------------------------|--------------------------------------------------------------------------------------|
| [PMDA-API- <i>p</i> Xy][NTf <sub>2</sub> ]     | 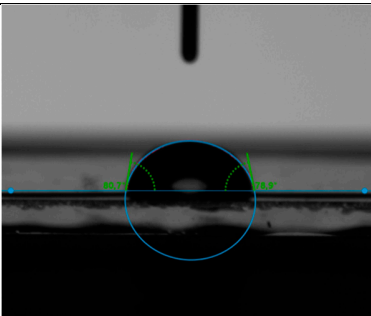   |    |
| [ODPA-API- <i>p</i> Xy][NTf <sub>2</sub> ]     |   |   |
| [BPDA-API- <i>p</i> Xy] [NTf <sub>2</sub> ]    |  |  |
| [PMDA-API-C <sub>3</sub> ] [NTf <sub>2</sub> ] |  |  |
| [ODPA-API-C <sub>3</sub> ] [NTf <sub>2</sub> ] |  |  |

|                                                 |                                                                                    |                                                                                     |
|-------------------------------------------------|------------------------------------------------------------------------------------|-------------------------------------------------------------------------------------|
| [BPDA-API-C <sub>3</sub> ] [NTf <sub>2</sub> ]  | 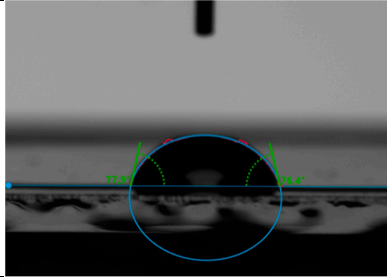  |   |
| [BPDA-API-C <sub>6</sub> ] [NTf <sub>2</sub> ]  |   |   |
| [BPDA-API-C <sub>12</sub> ] [NTf <sub>2</sub> ] |  |  |

**Figure S14.** Some contact angle measurements for the synthesized ionenes.
